# Supplementary material for: T2T Assembly of Oryza australiensis Reveals Centromere Repositioning Mechanisms and Identifies the EE Genome as Direct Donor of the Extinct DD Lineage
Source: Research Square preprint supplement (doi:10.21203/rs.3.rs-7517070/v1), 2025-09-17
Supplement: Supplementary file 1 [file d06d304aa9c234fc16e5cb87.docx]

Supplementary Information:

T2T Assembly of *Oryza australiensis* Reveals Centromere Repositioning Mechanisms and Identifies the EE Genome as Direct Donor of the Extinct DD Lineage

Yu Bao1†, Hanli You1†, Shuo Liu1, Guanqing Liu1, Yuechao Wu1,2, Qingqing Yang1, Qi You1, Peng Liu3, Chuandeng Yi1*, Wenli Zhang4*, Zhukuan Cheng1*, Tao Zhang1,2,3*

1. Jiangsu Key Laboratory of Crop Genomics and Molecular Breeding/Zhongshan Biological Breeding Laboratory/Jiangsu Co-Innovation Center for Modern Production Technology of Grain Crops, Agricultural College of Yangzhou University, Yangzhou 225009, China

2. Chengdu Institute of Biology, Chinese Academy of Sciences, Chengdu 610213, China

3. Joint International Research Laboratory of Agriculture and Agri-Product Safety/The Ministry of Education of China, Yangzhou University, Yangzhou 225009, China.

4. National Key Laboratory for Crop Genetics and Germplasm Enhancement and Utilization, Collaborative Innovation Center for Modern Crop Production Co-Sponsored By Province and Ministry (CIC-MCP), Nanjing Agricultural University, Nanjing, 210095, China

**Table of Content: Supplementary Figures**

- Supplementary Figure 1. ONT sequence length information and genome size and heterozygosity estimation.
- Supplementary Figure 2. The pipeline of genome assembly.
- Supplementary Figure 3. Characteristics of the *O. australiensis* genome.
- Supplementary Figure 4. Coverage of CENH3 ChIP-seq, ONT, and Illumina reads in the centromere on chromosome of *O. australiensis.*
- Supplementary Figure 5. Sequence alignment of centromere regions assembled by Necat and Nextdenovo software.
- Supplementary Figure 6. The pairwise synteny visualization of centromere regions (Chr1-Chr6) among *O. australiensis*, *O. sativa* (NIP and MH63), *O. brachyantha* and *Leersia perrieri.*
- Supplementary Figure 7. The pairwise synteny visualization of centromere regions (Chr7-Chr12) among *O. australiensis*, *O. sativa* (NIP and MH63), *O. brachyantha* and *Leersia perrieri.*
- Supplementary Figure 8. Schematic diagram of the dynamic changes of centromere sites in *O. australiensis*, *O. sativa*, *O. brachyantha.*
- Supplementary Figure 9. Characteristics of centromeres across *O. australiensis* Chr1-Chr6, including the information on CENH3, satellites, *Gypsy*, *Copia*, *CRM* and gene.
- Supplementary Figure 10. Characteristics of centromeres across *O. australiensis* Chr7-Chr12, including the information on CENH3, satellites, *Gypsy*, *Copia*, *CRM*, and gene.
- Supplementary Figure 11. Distribution of repeat sequence markers on the genomes of *O. australiensis* and *O. alta*.

**Table of Content: Supplementary Tables**

- Supplementary Table 1 The mapping rate of sequencing reads to assembled genome.
- Supplementary Table 2 Statistics of *O. australiensis* genome annotation.
- Supplementary Table 3 Repetitive elements in *O. australiensis* genome assembly.
- Supplementary Table 4 Identified regions of telomeres in *O. australiensis*.
- Supplementary Table 5 Identified regions of centromeres in *O. australiensis*.
- Supplementary Table 6 Satellite repetitive sequences in the centromeric region of the *Oryza* genus.
- Supplementary Table 7 The total length of satellite repetitive sequences in *O. australiensis* and *O. sativa*.
- Supplementary Table 8 Information about genes in functional centromere regions.
- Supplementary Table 9 Proportions of TEs in the *Oryza* genome.
- Supplementary Table 10 Abundance of Copia and Gypsy LTR subfamilies in the *Oryza* genus.
- Supplementary Table 11 The sequence of *Angela*-Rep-DDEE.
- Supplementary Table 12 Statistics of evolutionary rate in CC, EE and CCDD genomes.
- Supplementary Table 13 *Angela*-Rep-DDEE sequence primers.


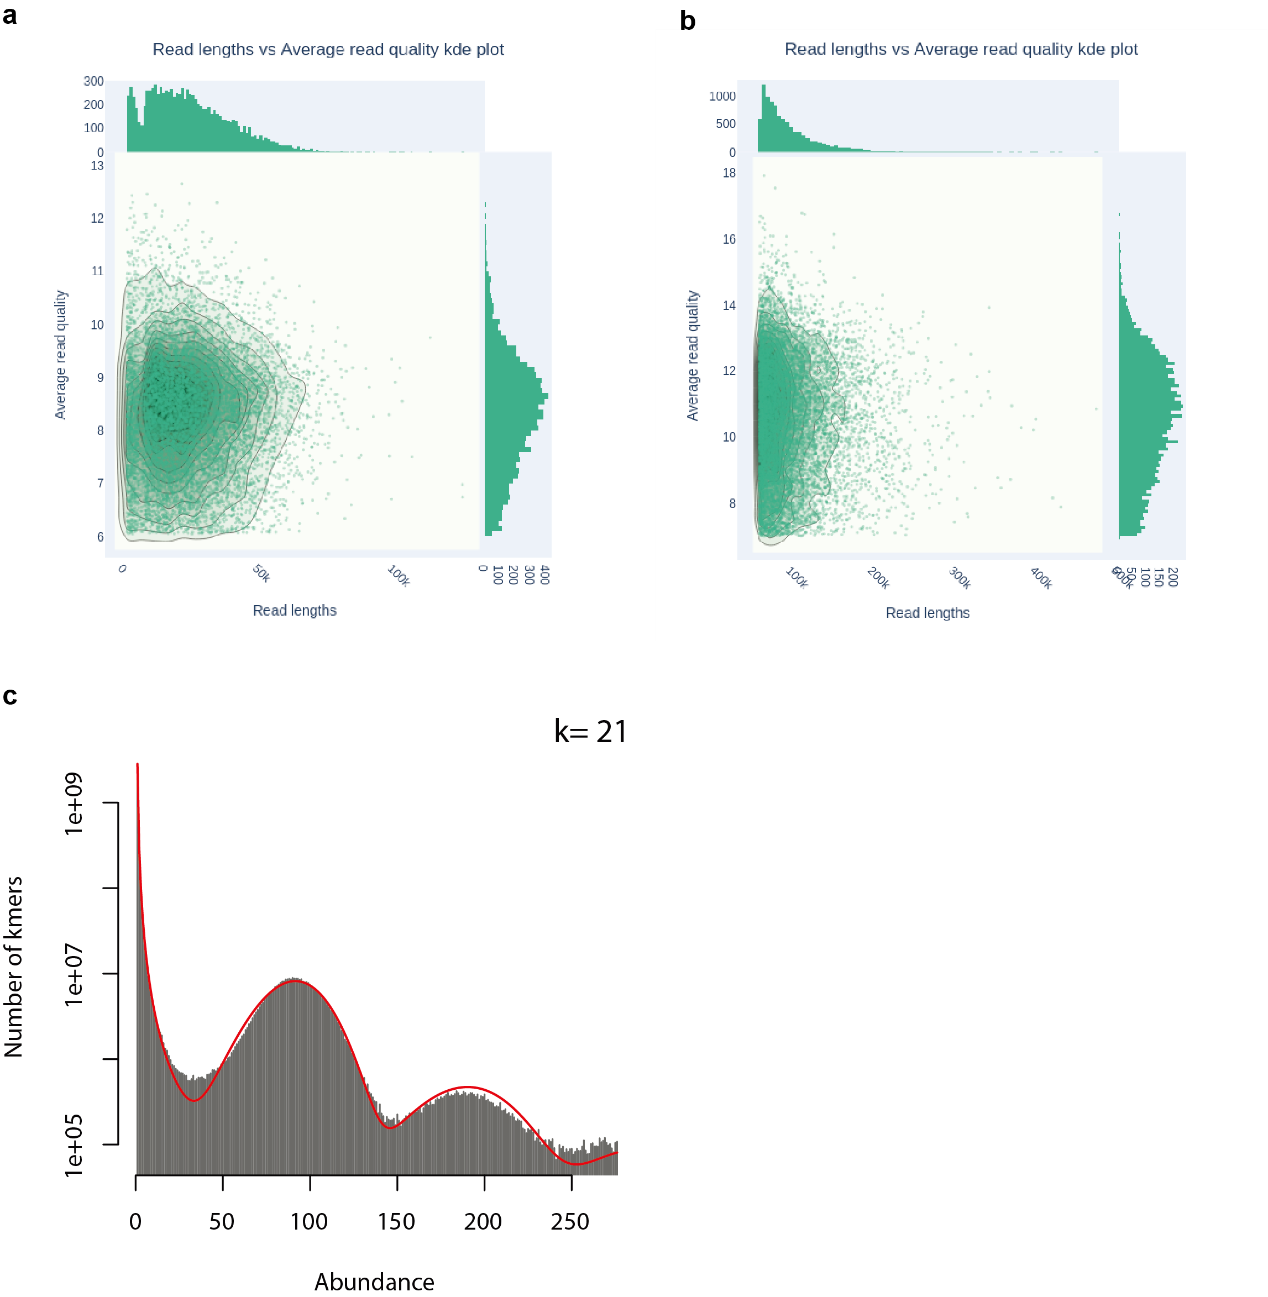


Supplementary Figure 1. ONT sequence length information and genome size and heterozygosity estimation

**a-b**, Bivariate plot of base call quality against percent identity with a kernel density estimate and marginal density plots. **a**: PromethION reads; **b**: Ultra-long reads.

**c**, K-mer (k = 21) distribution of *O. australiensis*. The solid line and shadows represent the ratio of k-mer species with difference depths.


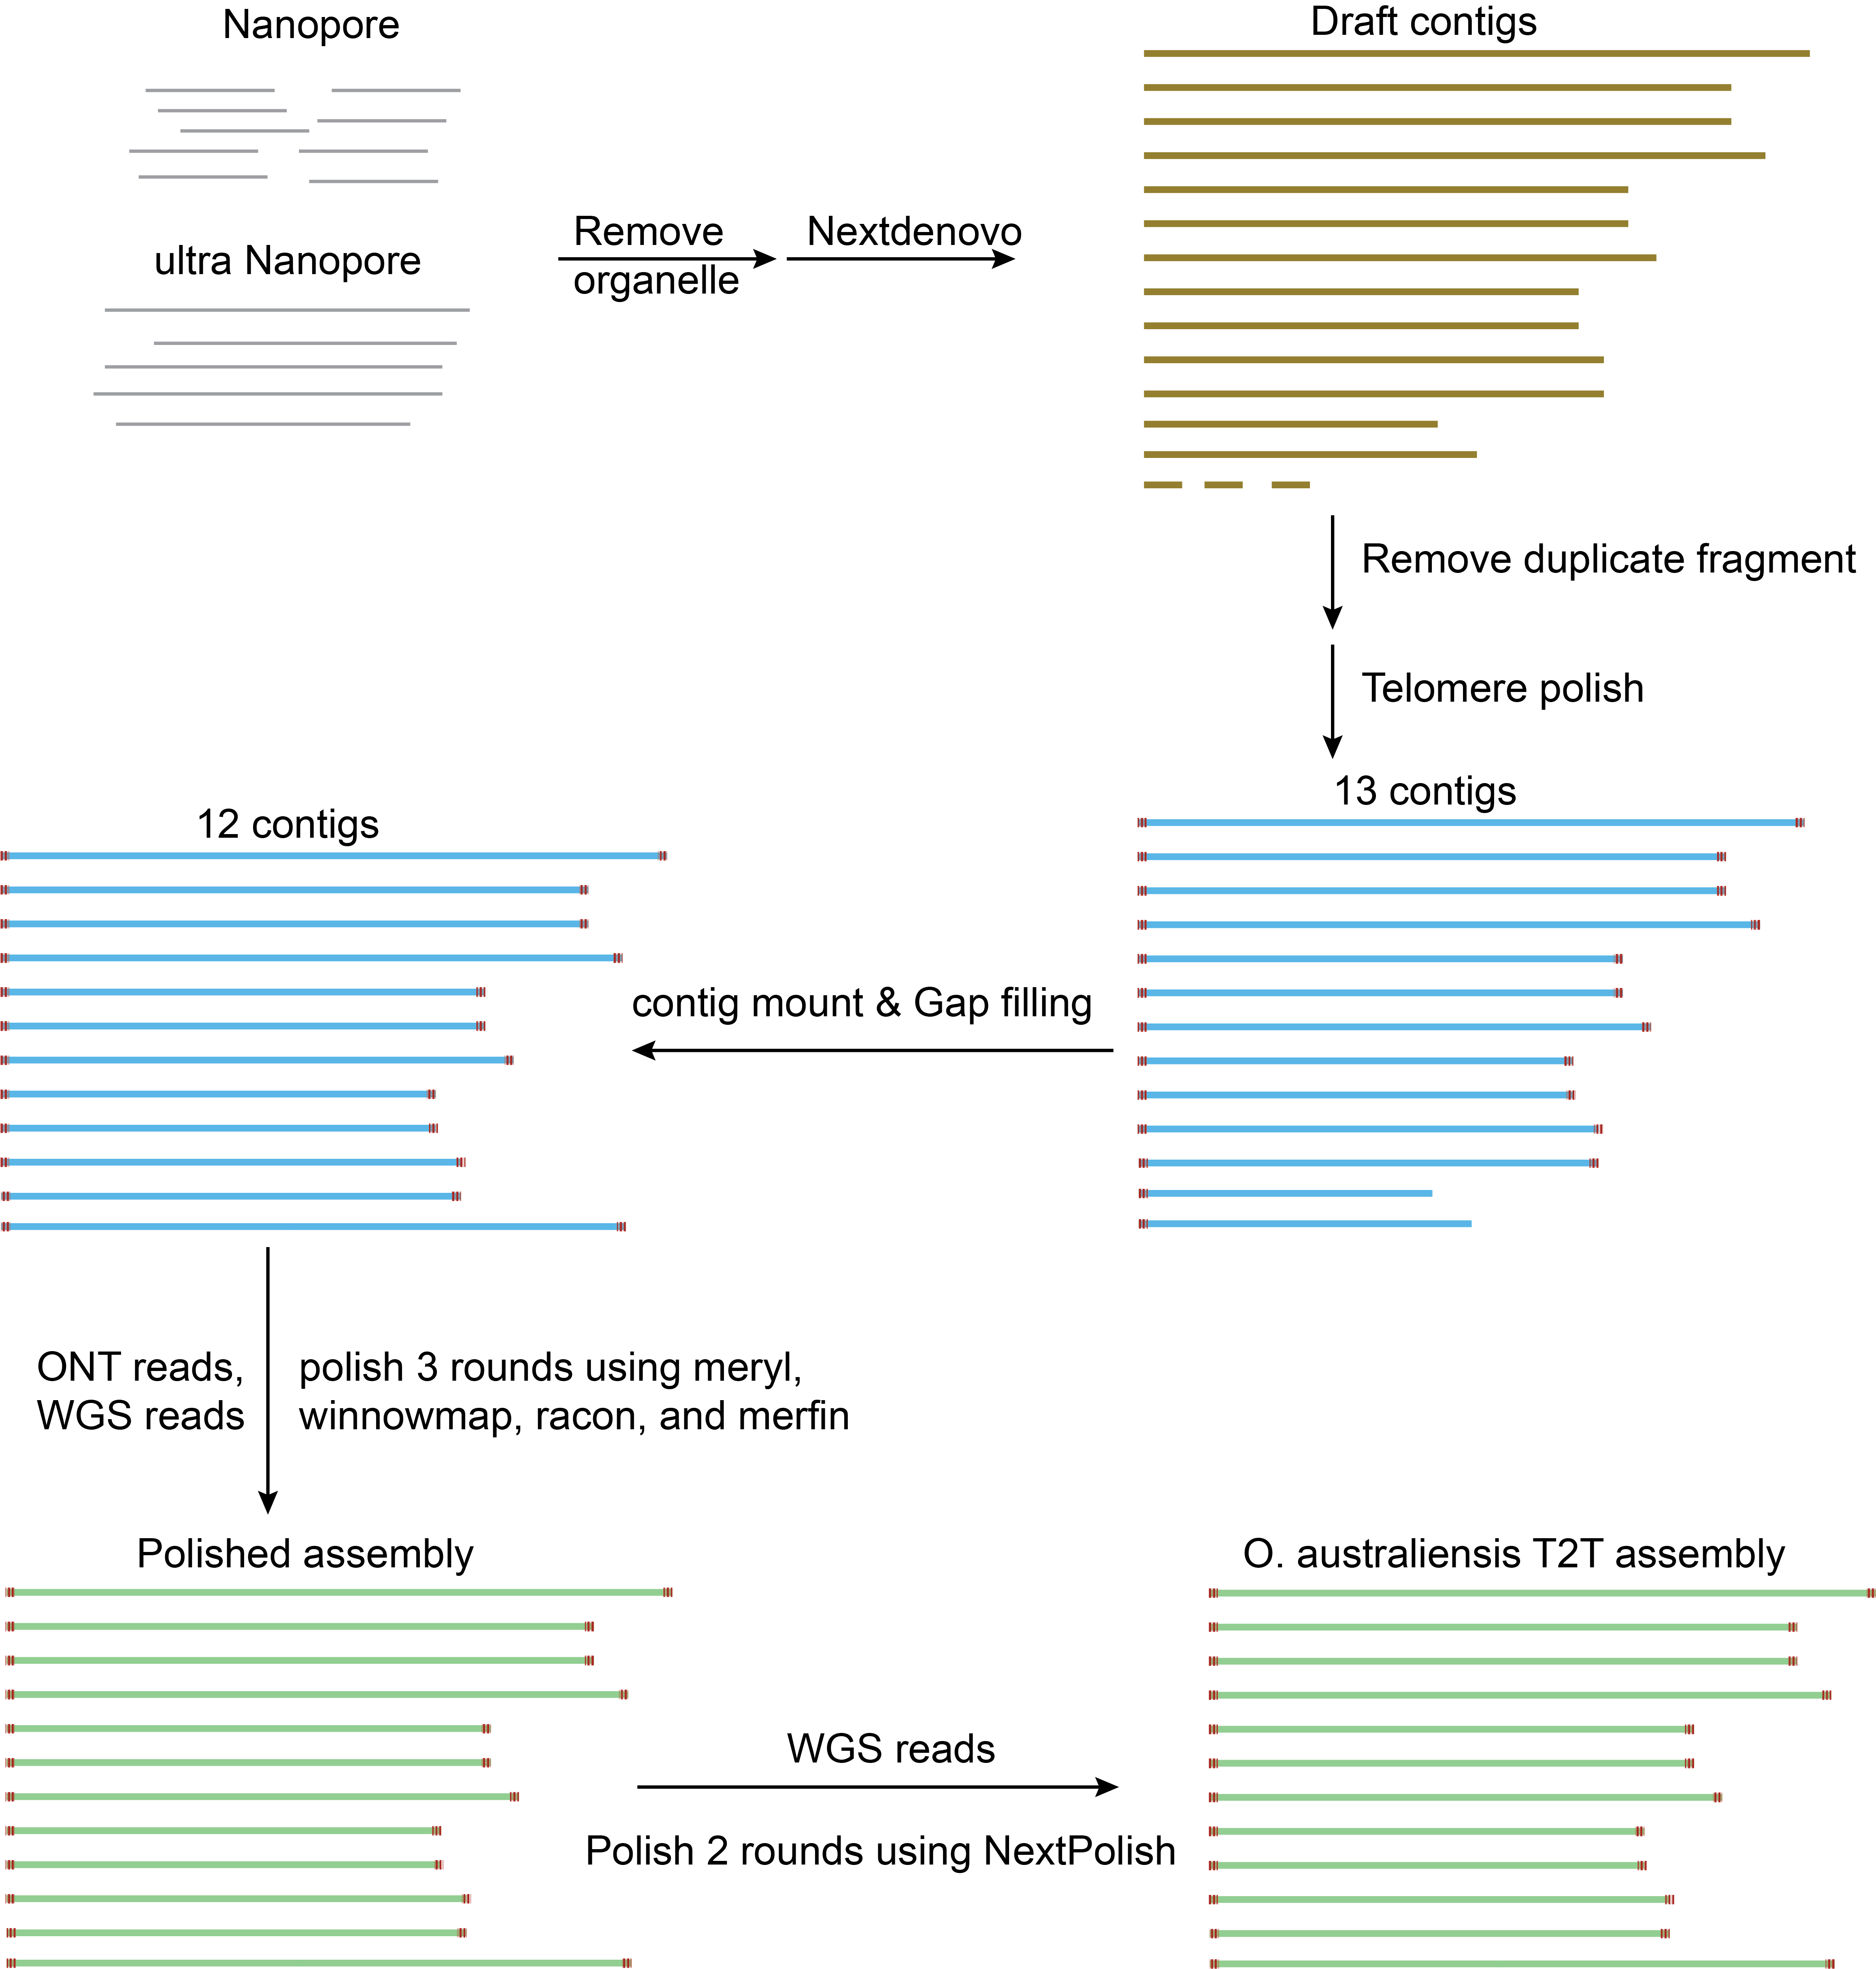


Supplementary Figure 2. The pipeline of genome assembly.


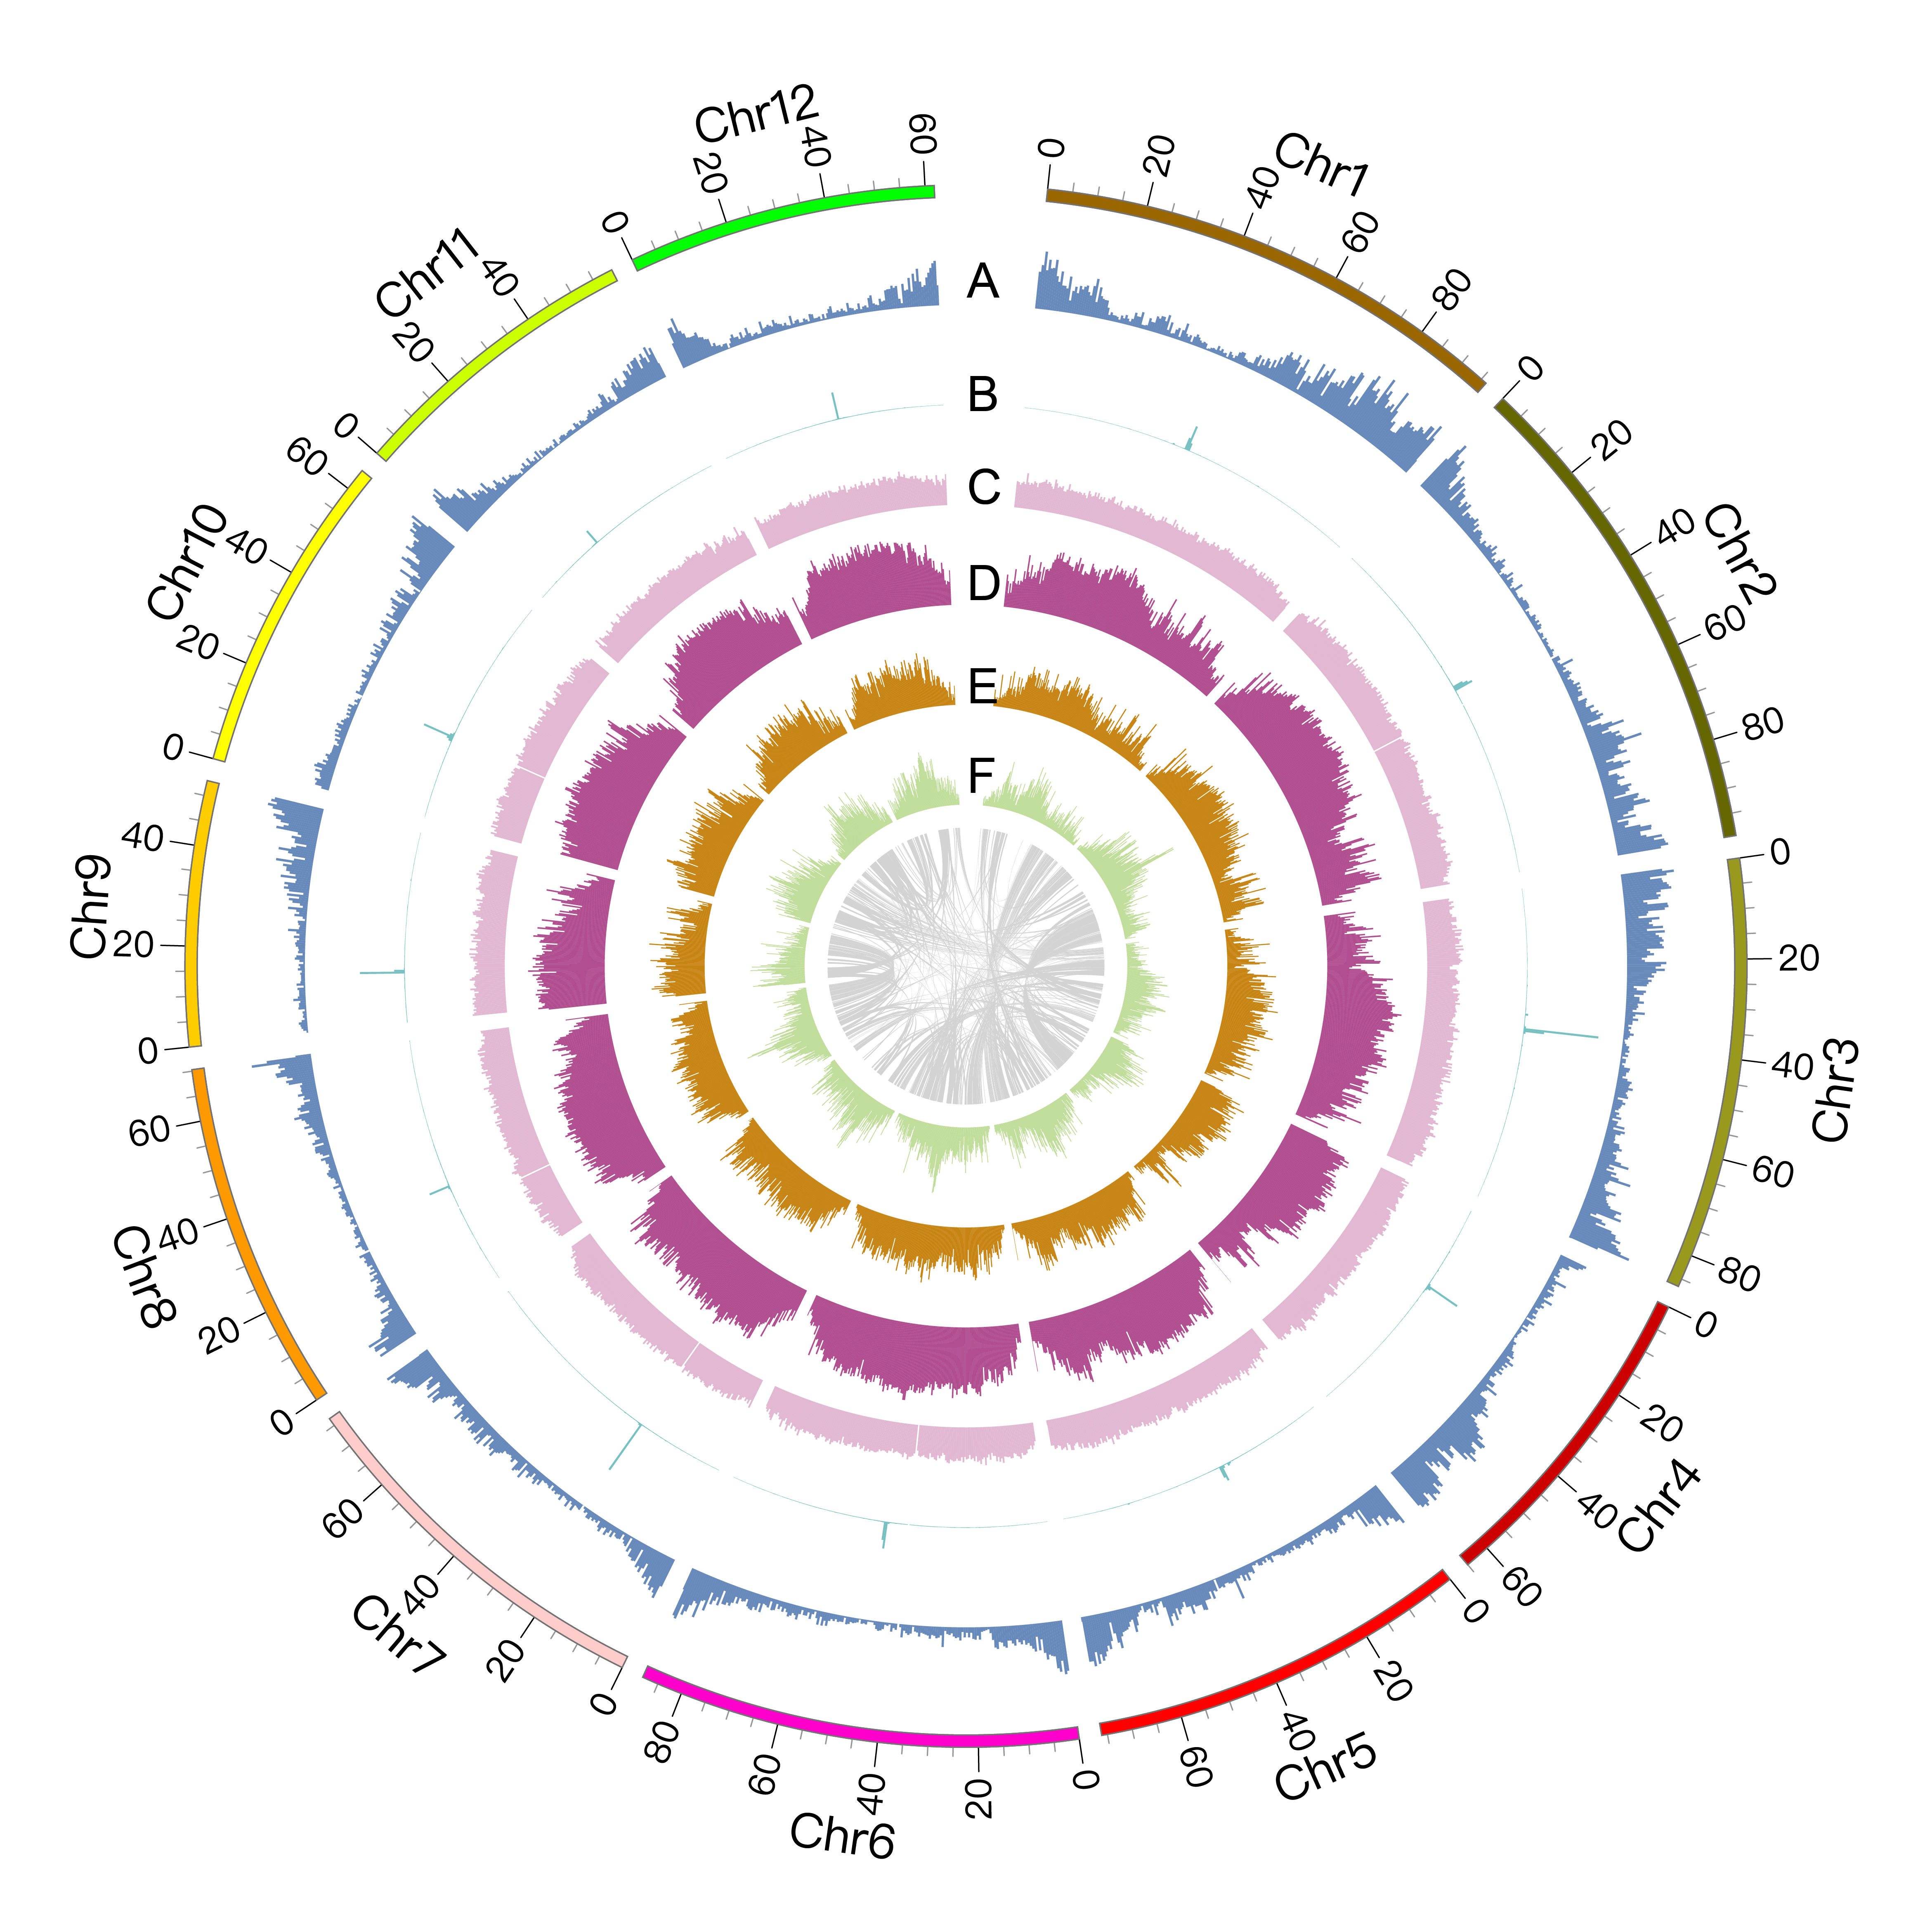


Supplementary Figure 3. Characteristics of the *O. australiensis* genome. The circle from outside to inside represents chromosome (A) gene density, (B) CENH3 ChIP-seq reads density, (C) GC content, (D) TE density, (E) *Gypsy* density, (F) *Copia* density, and gene collinearity connected by curved lines.


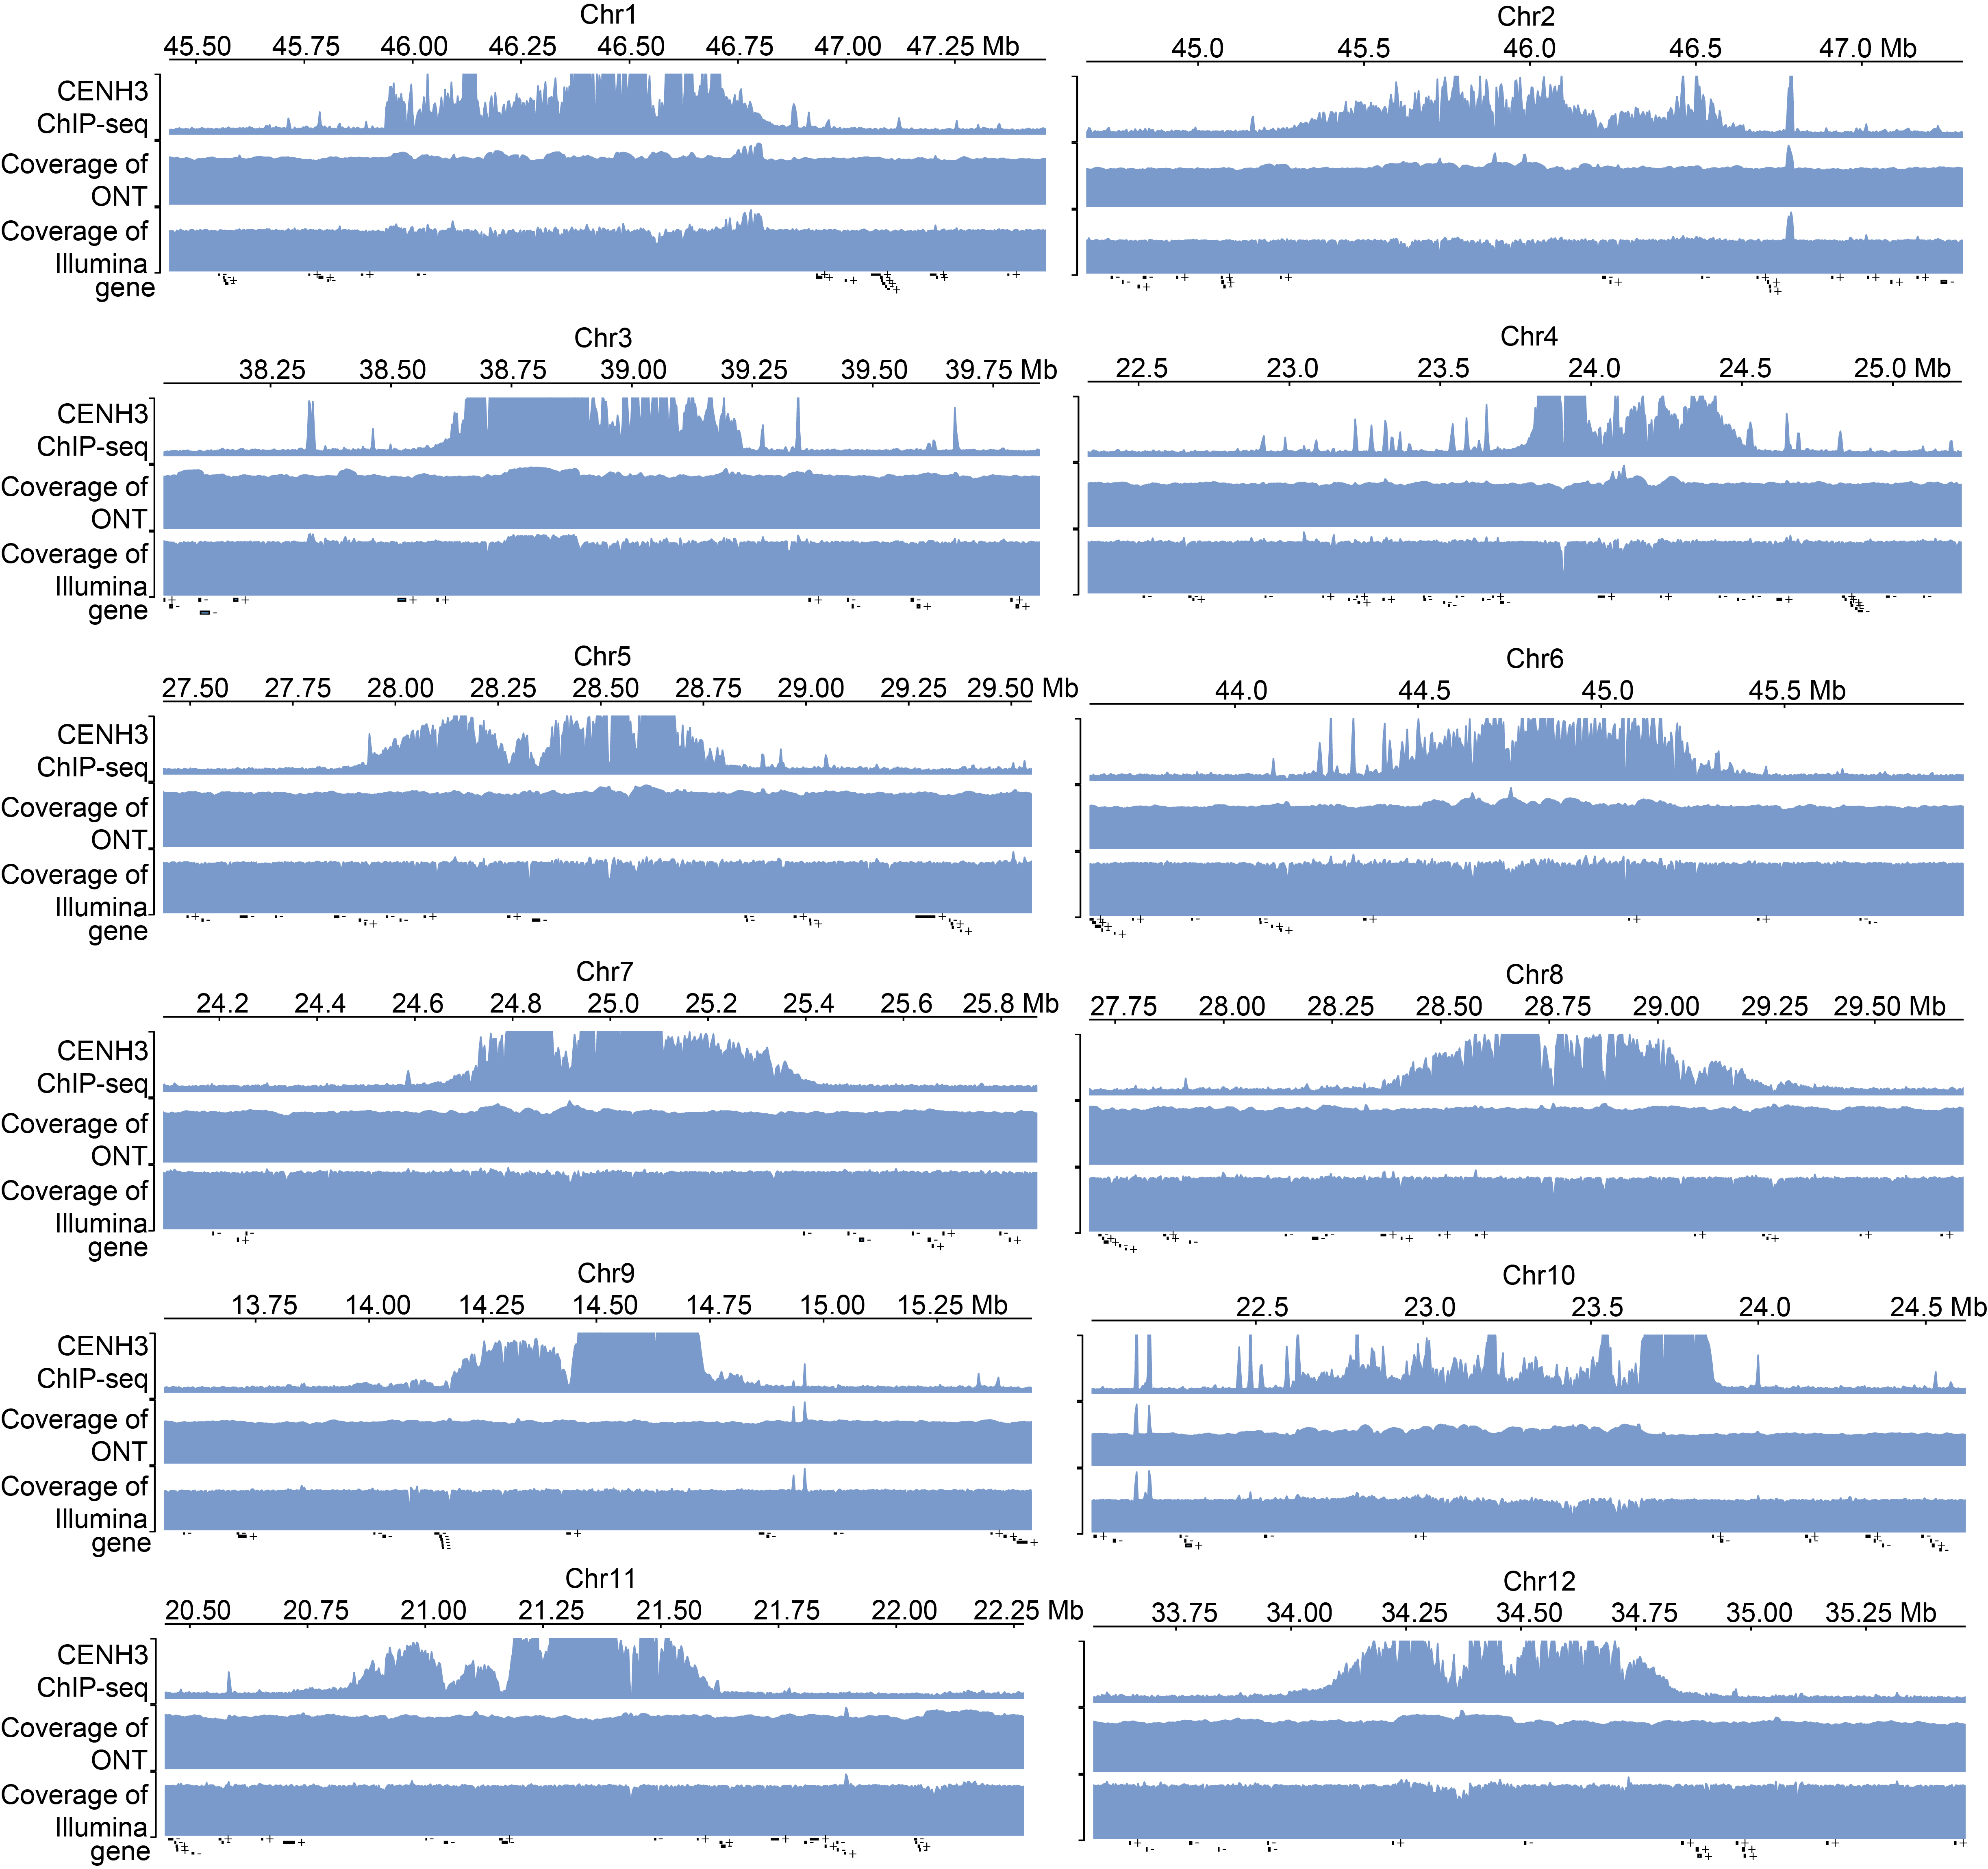


Supplementary Figure 4. Coverage of CENH3 ChIP-seq, ONT, and Illumina reads in the centromere on chromosome of *O. australiensis*


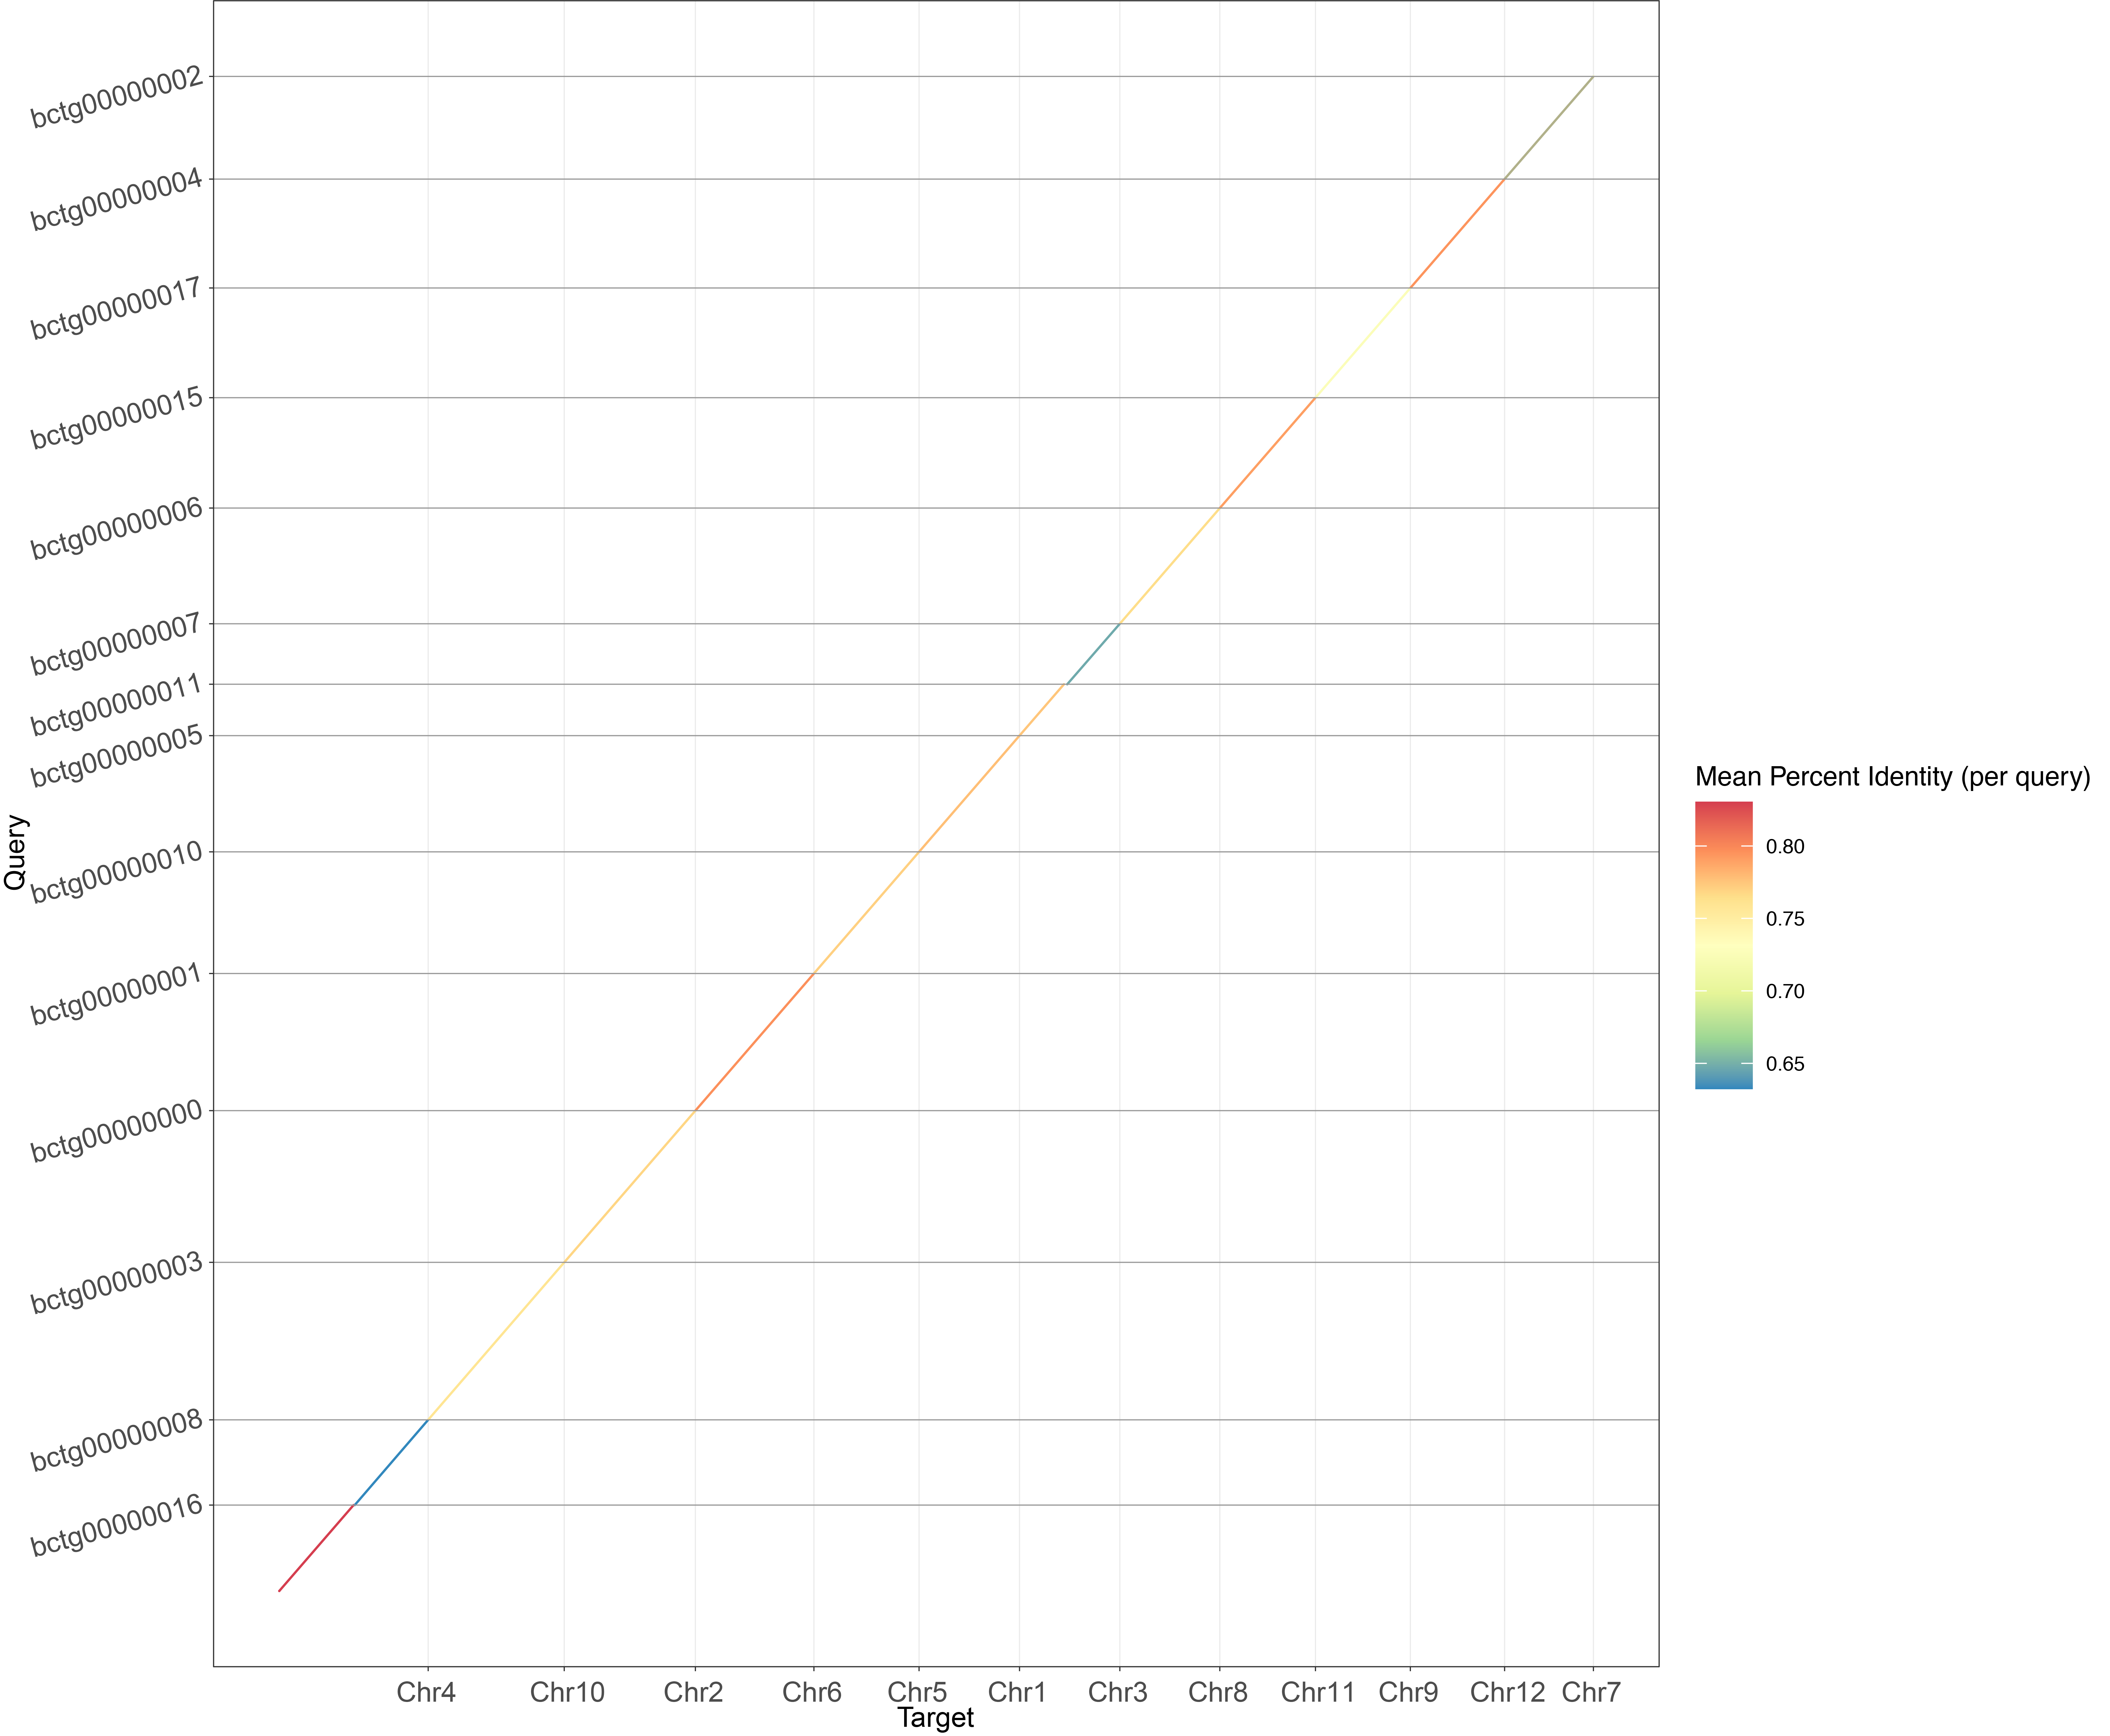


Supplementary Figure 5. Sequence alignment of centromere regions assembled by Necat and Nextdenovo software.


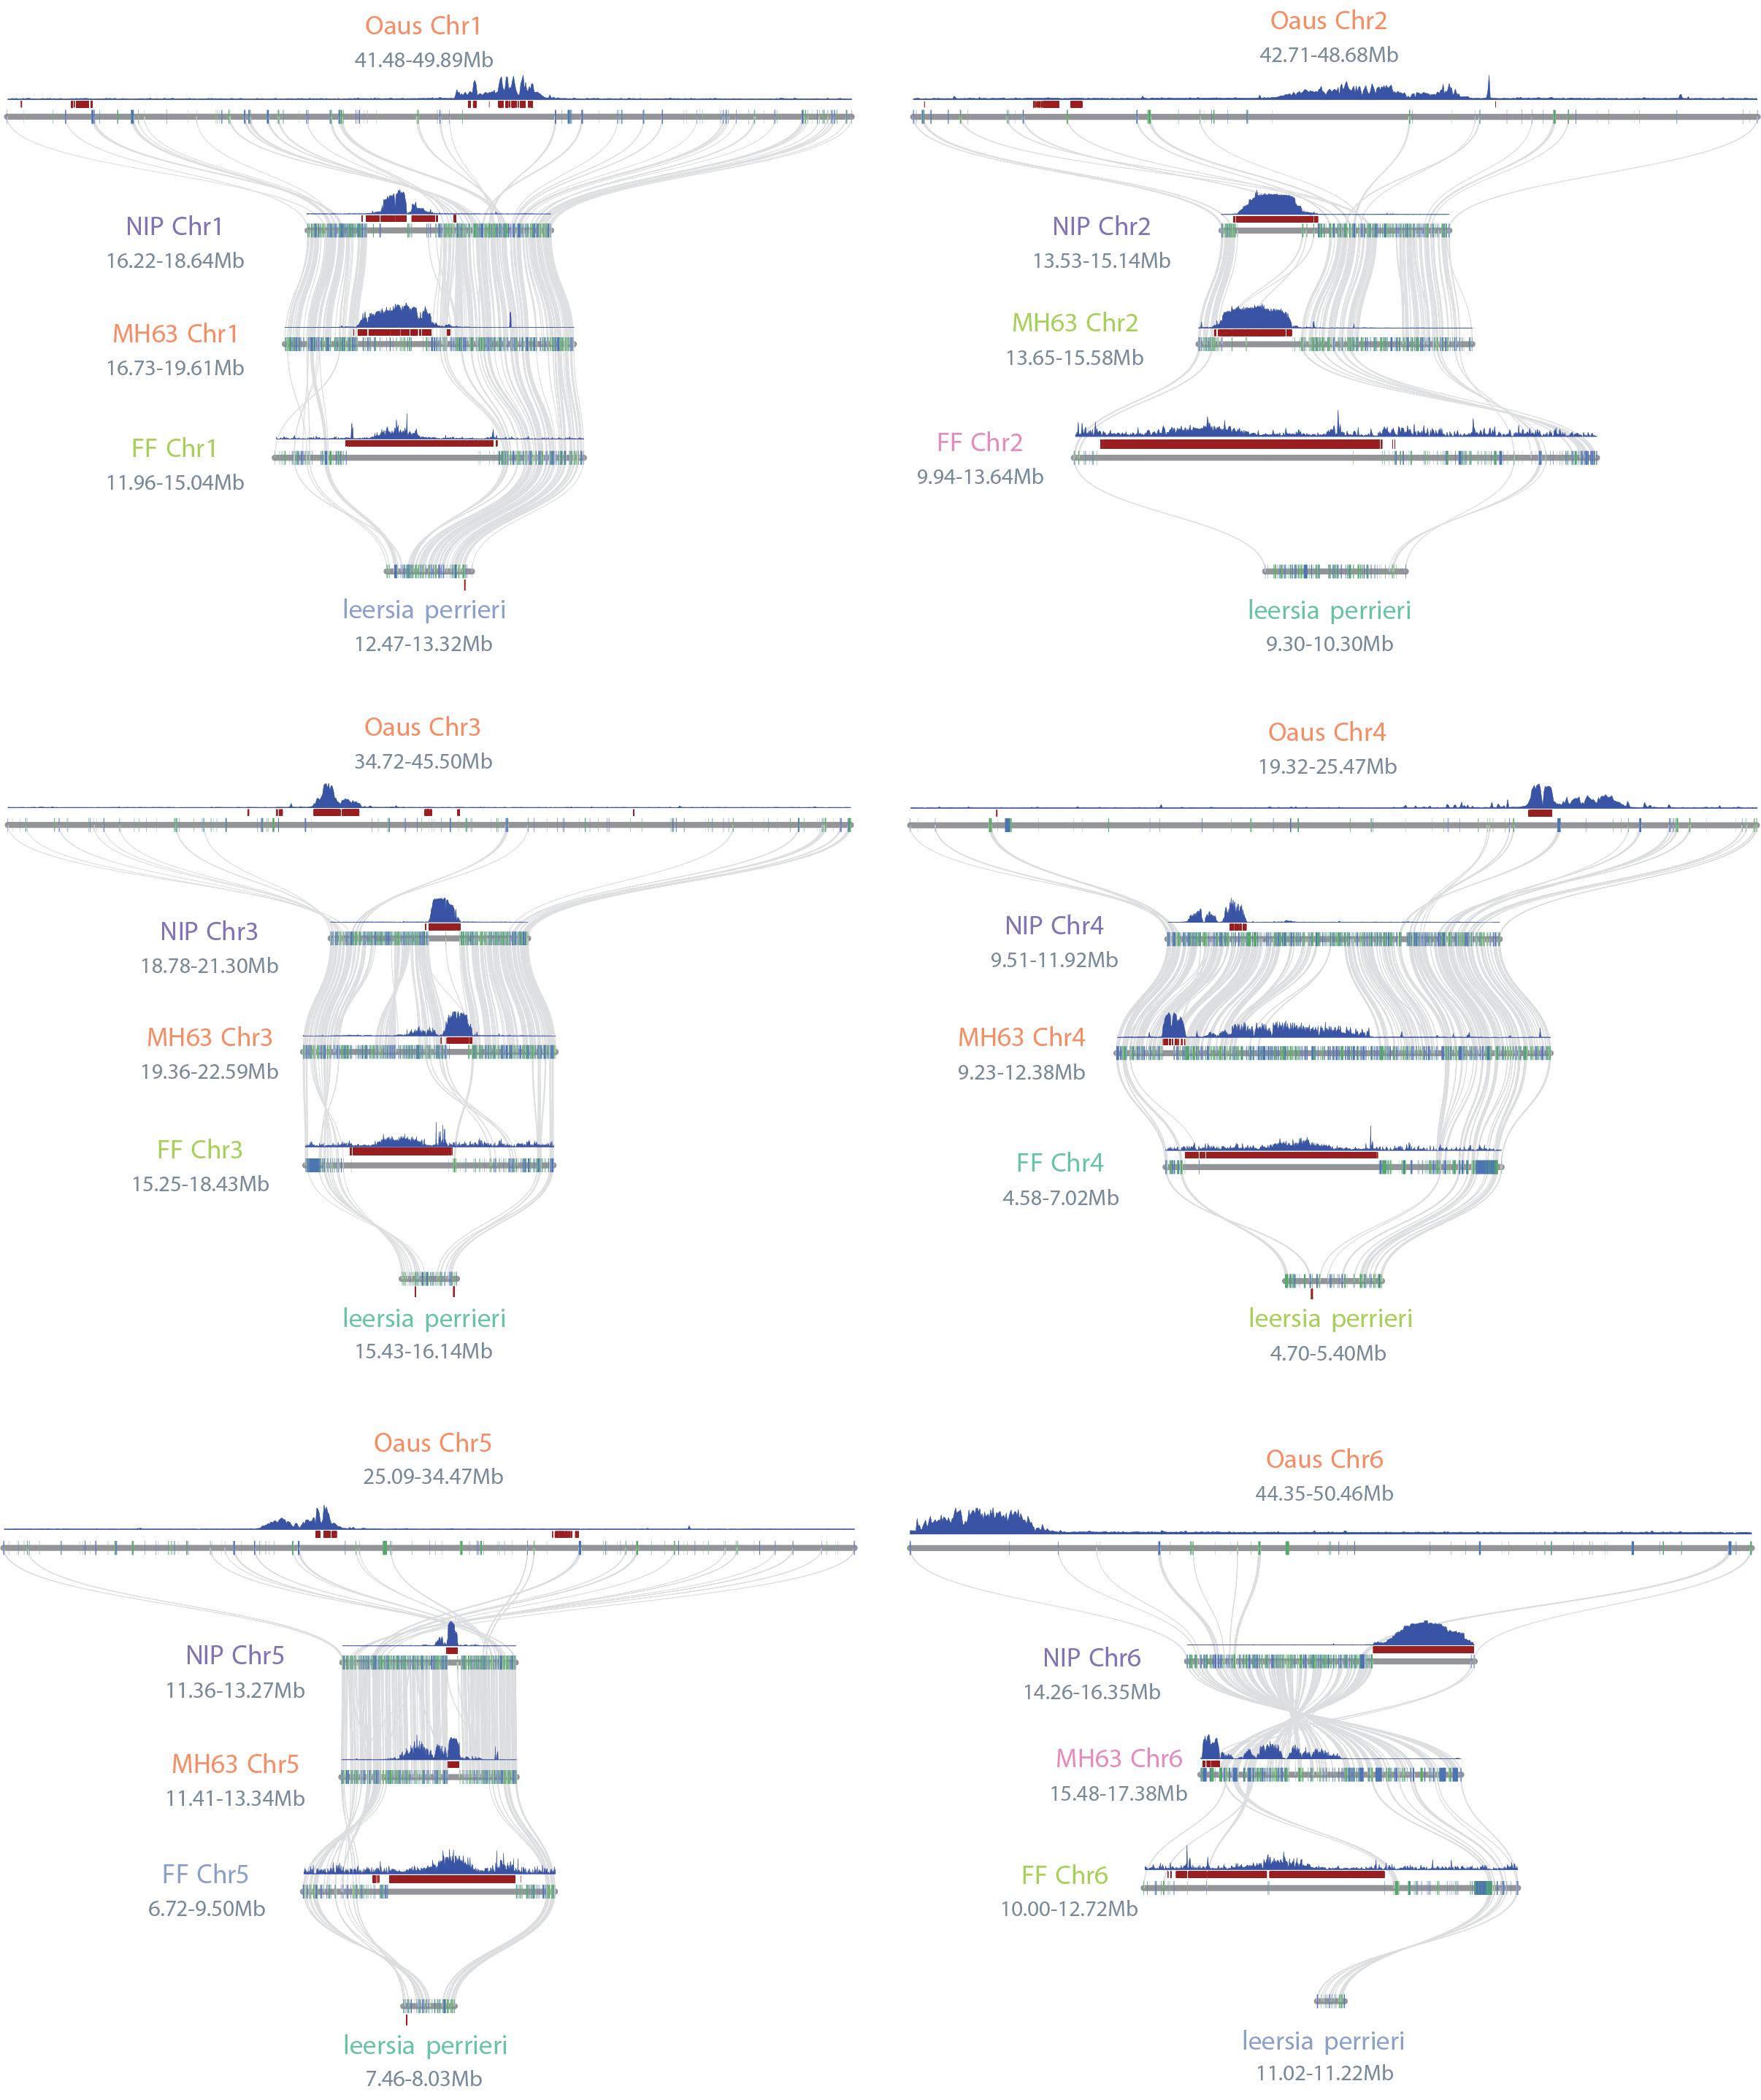


Supplementary Figure 6. The pairwise synteny visualization of centromere regions (Chr1-Chr6) among *O. australiensis*, *O. sativa* (NIP and MH63), *O. brachyantha* and *Leersia perrieri.*


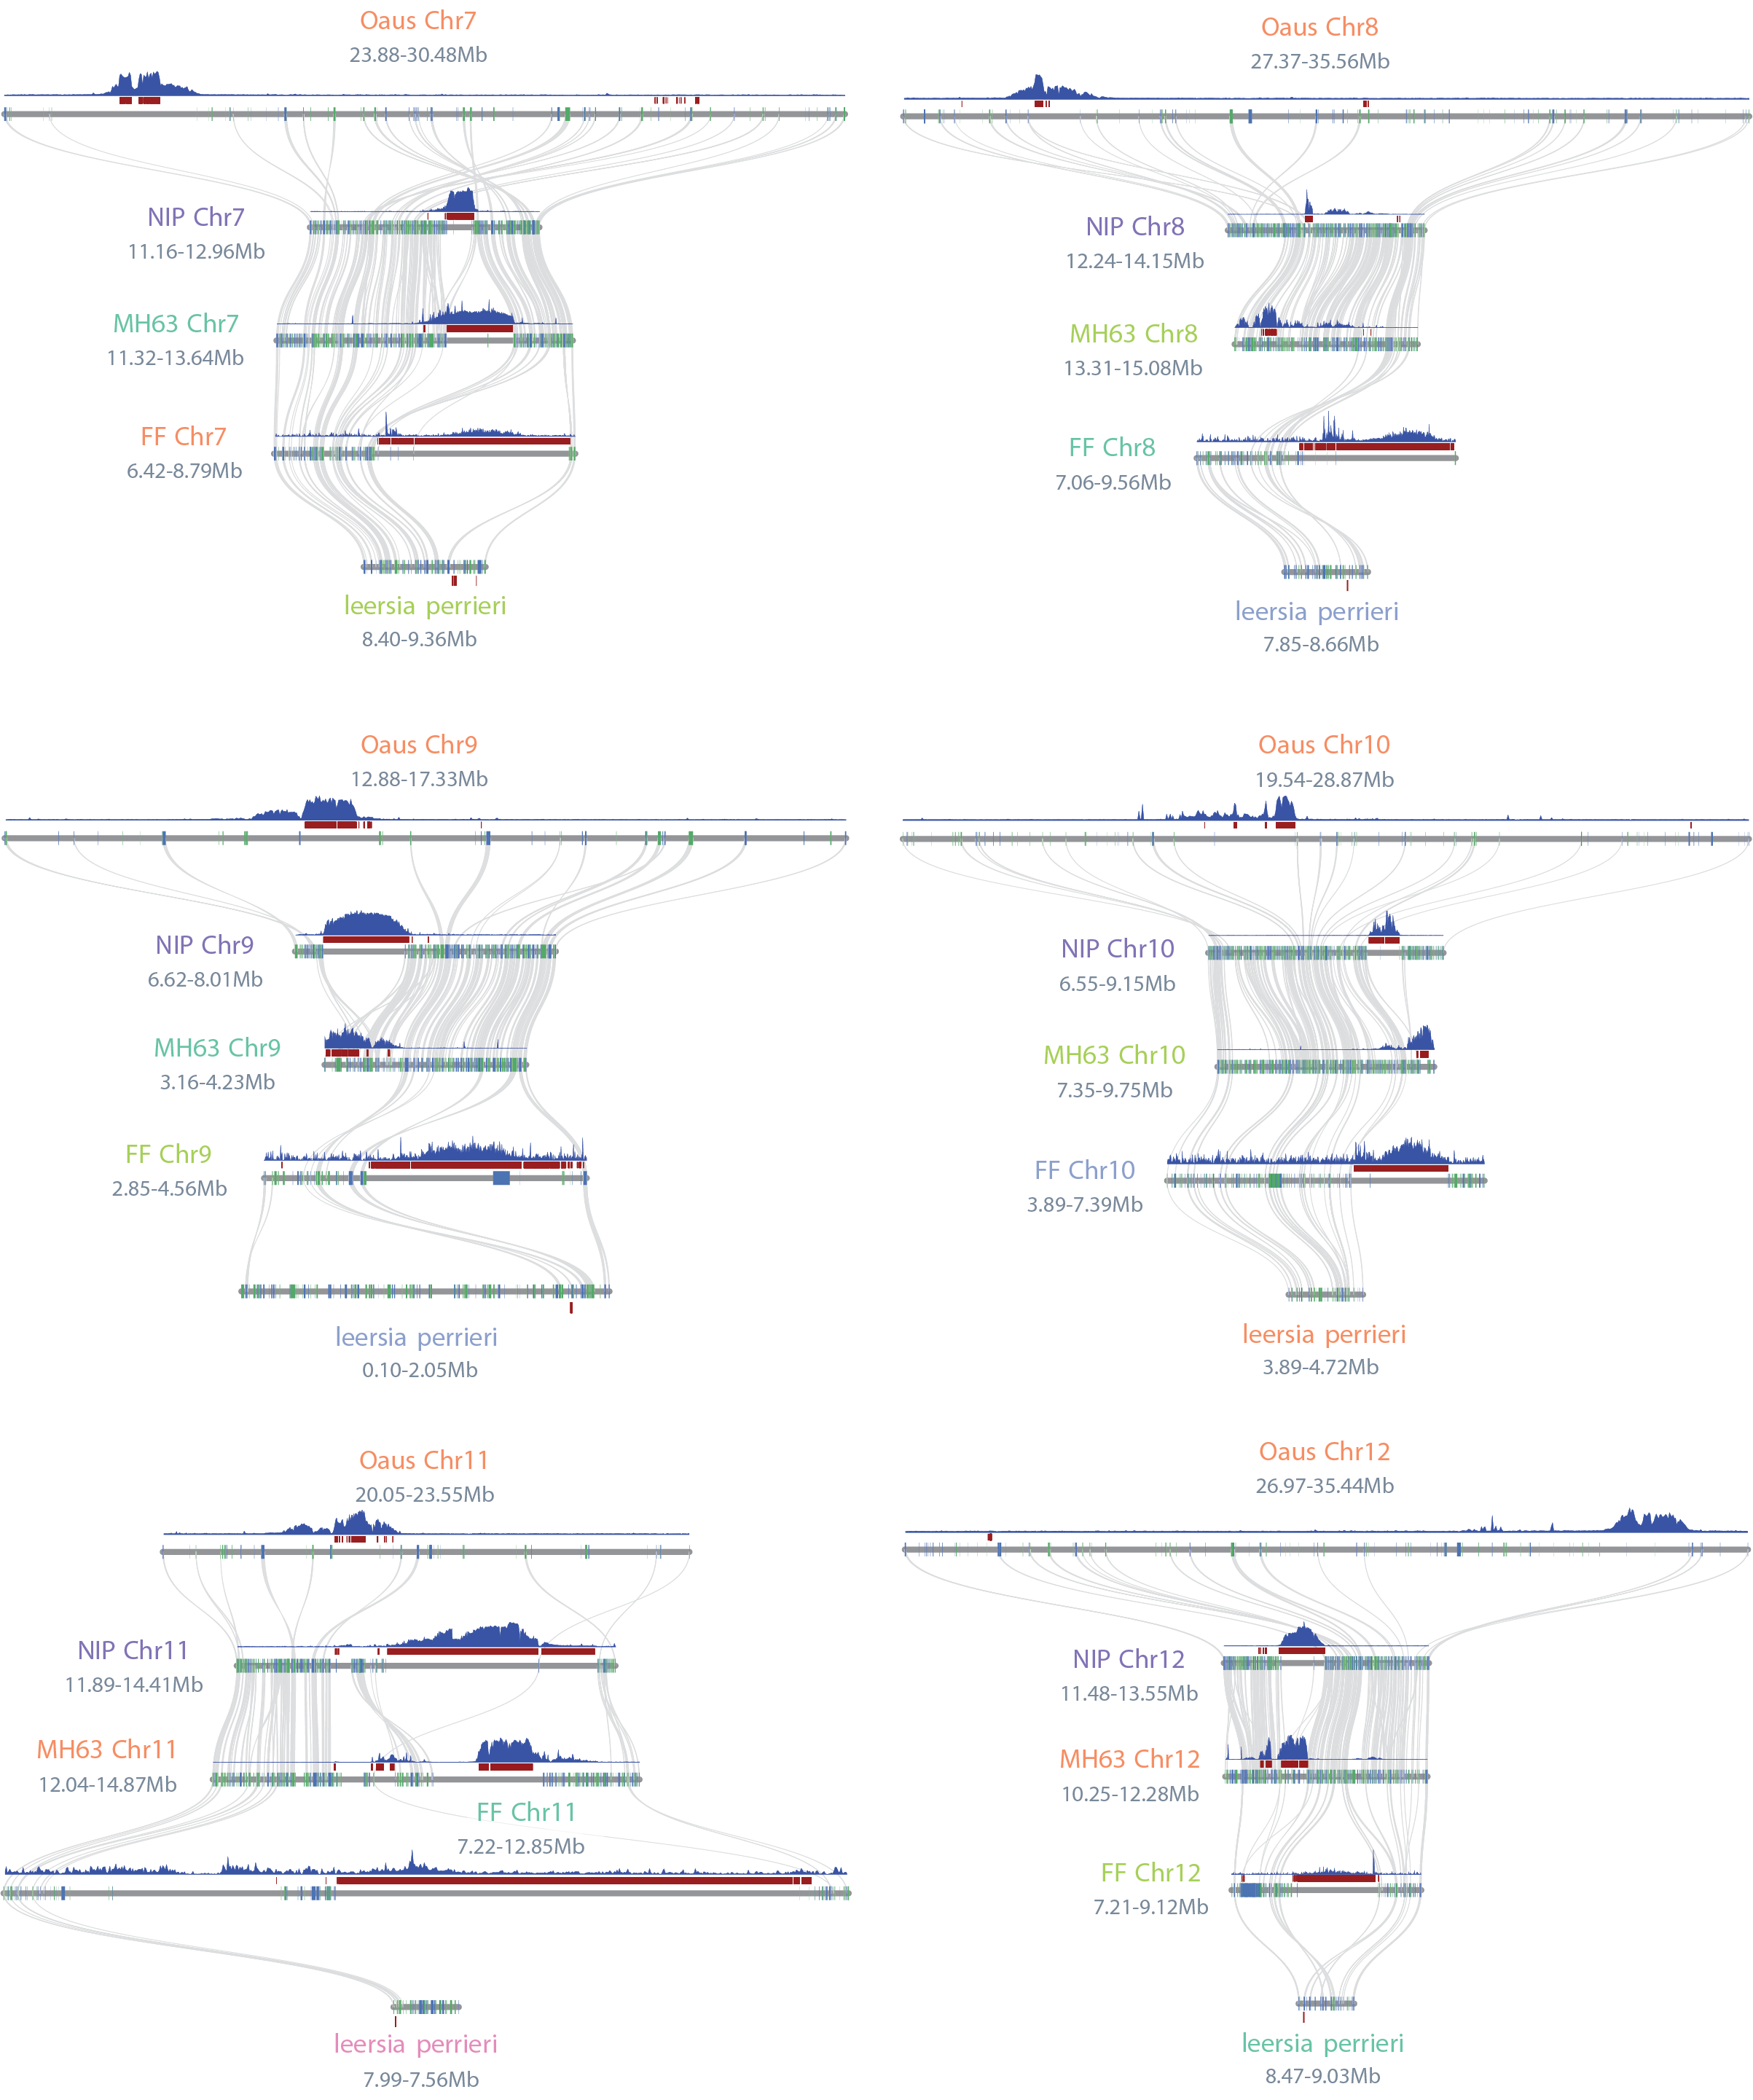


Supplementary Figure 7. The pairwise synteny visualization of centromere regions (Chr7-Chr12) among *O. australiensis*, *O. sativa* (NIP and MH63), *O. brachyantha* and *Leersia perrieri.*


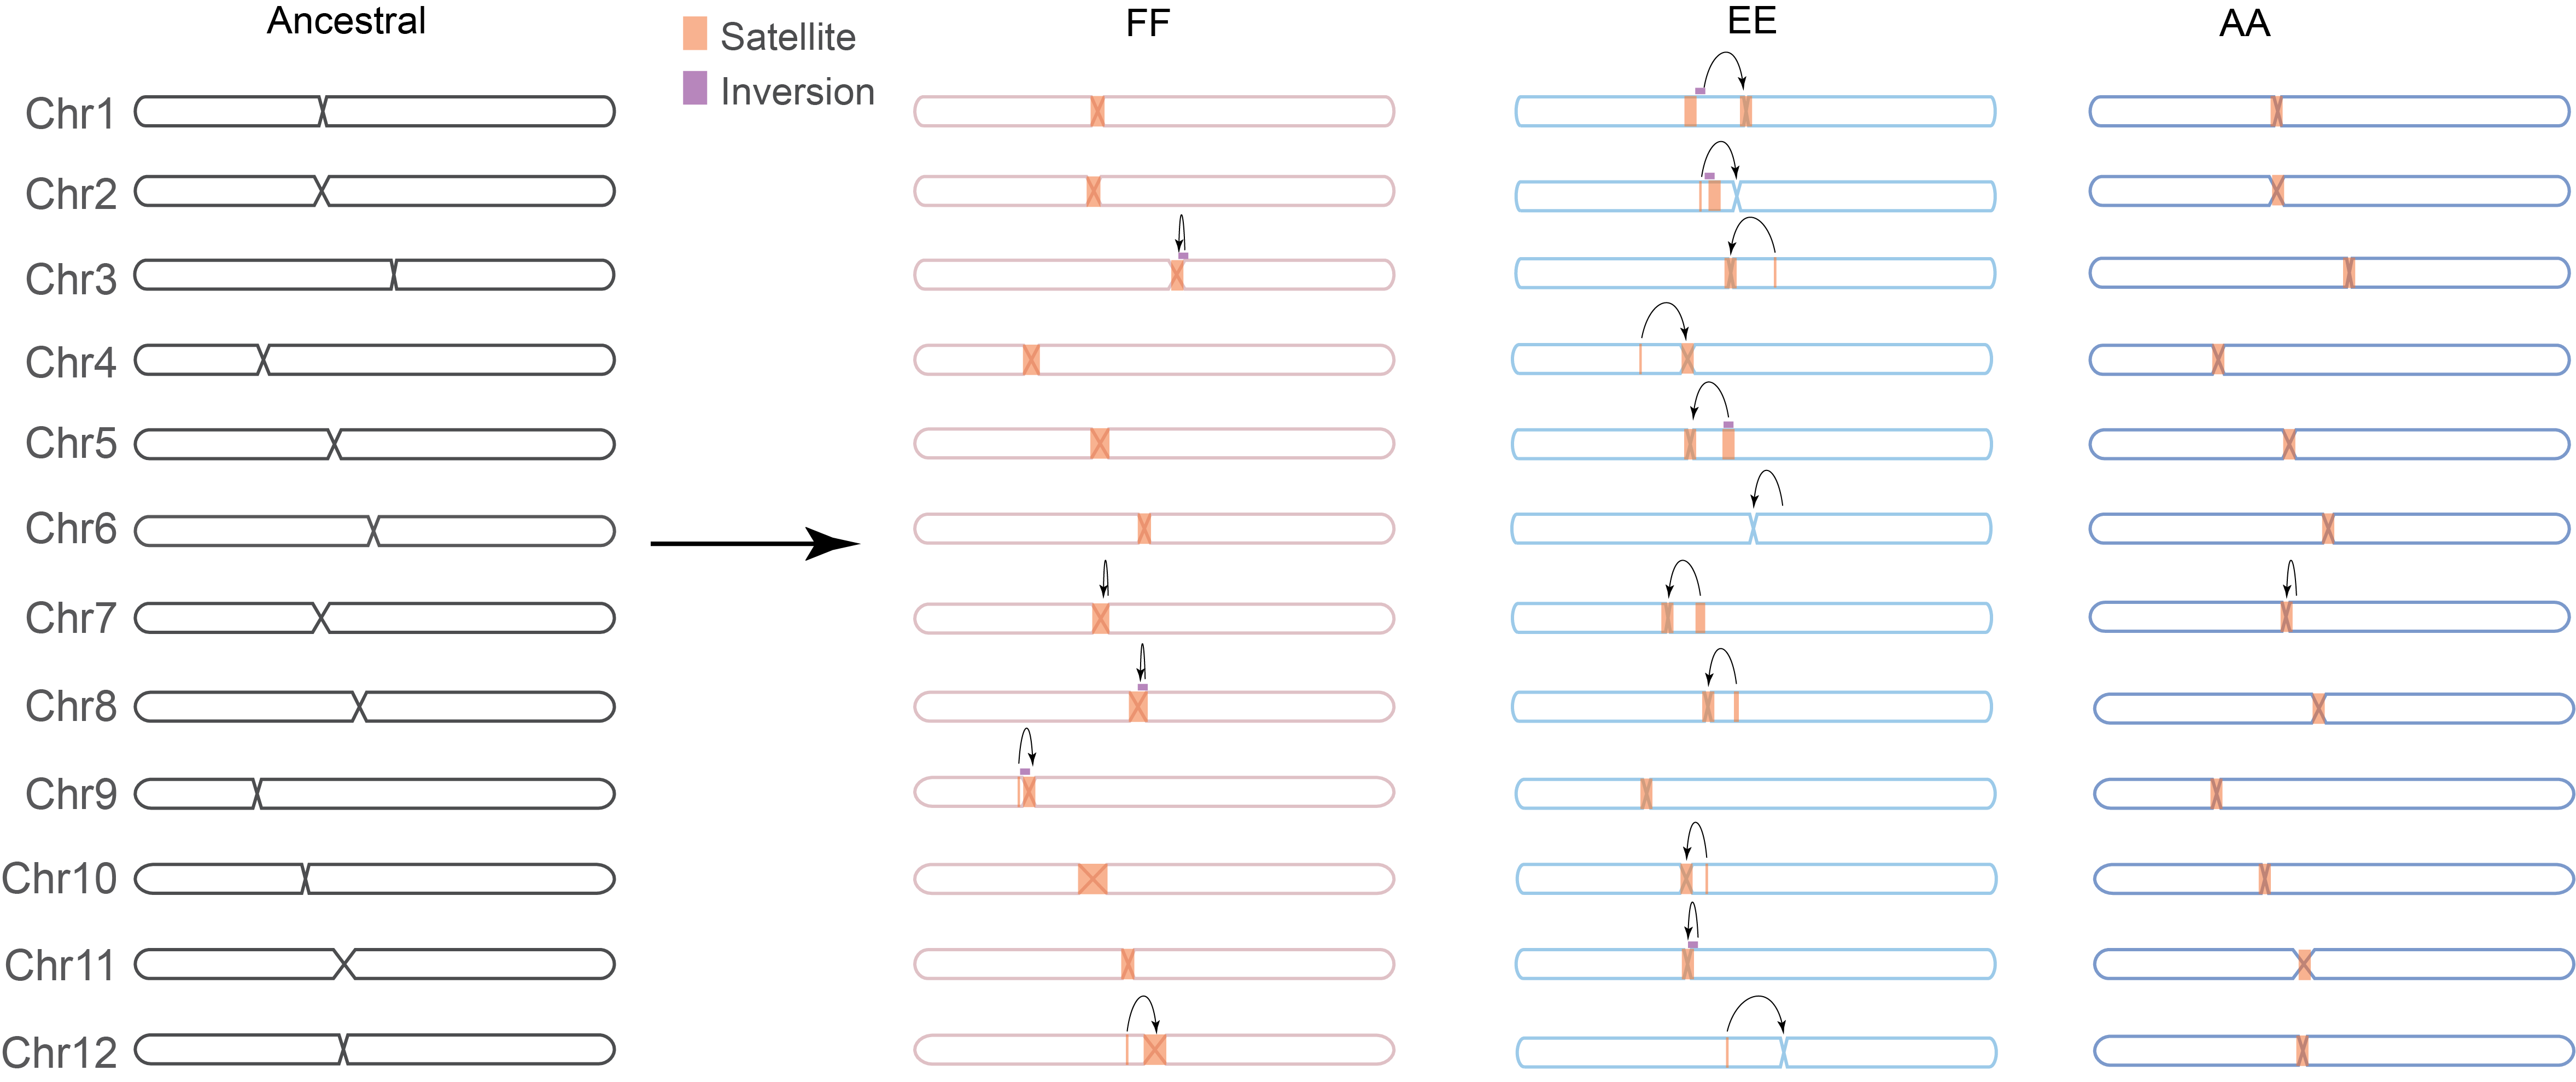


Supplementary Figure 8. Schematic diagram of the dynamic changes of centromere sites in *O. australiensis*, *O. sativa*, *O. brachyantha.*


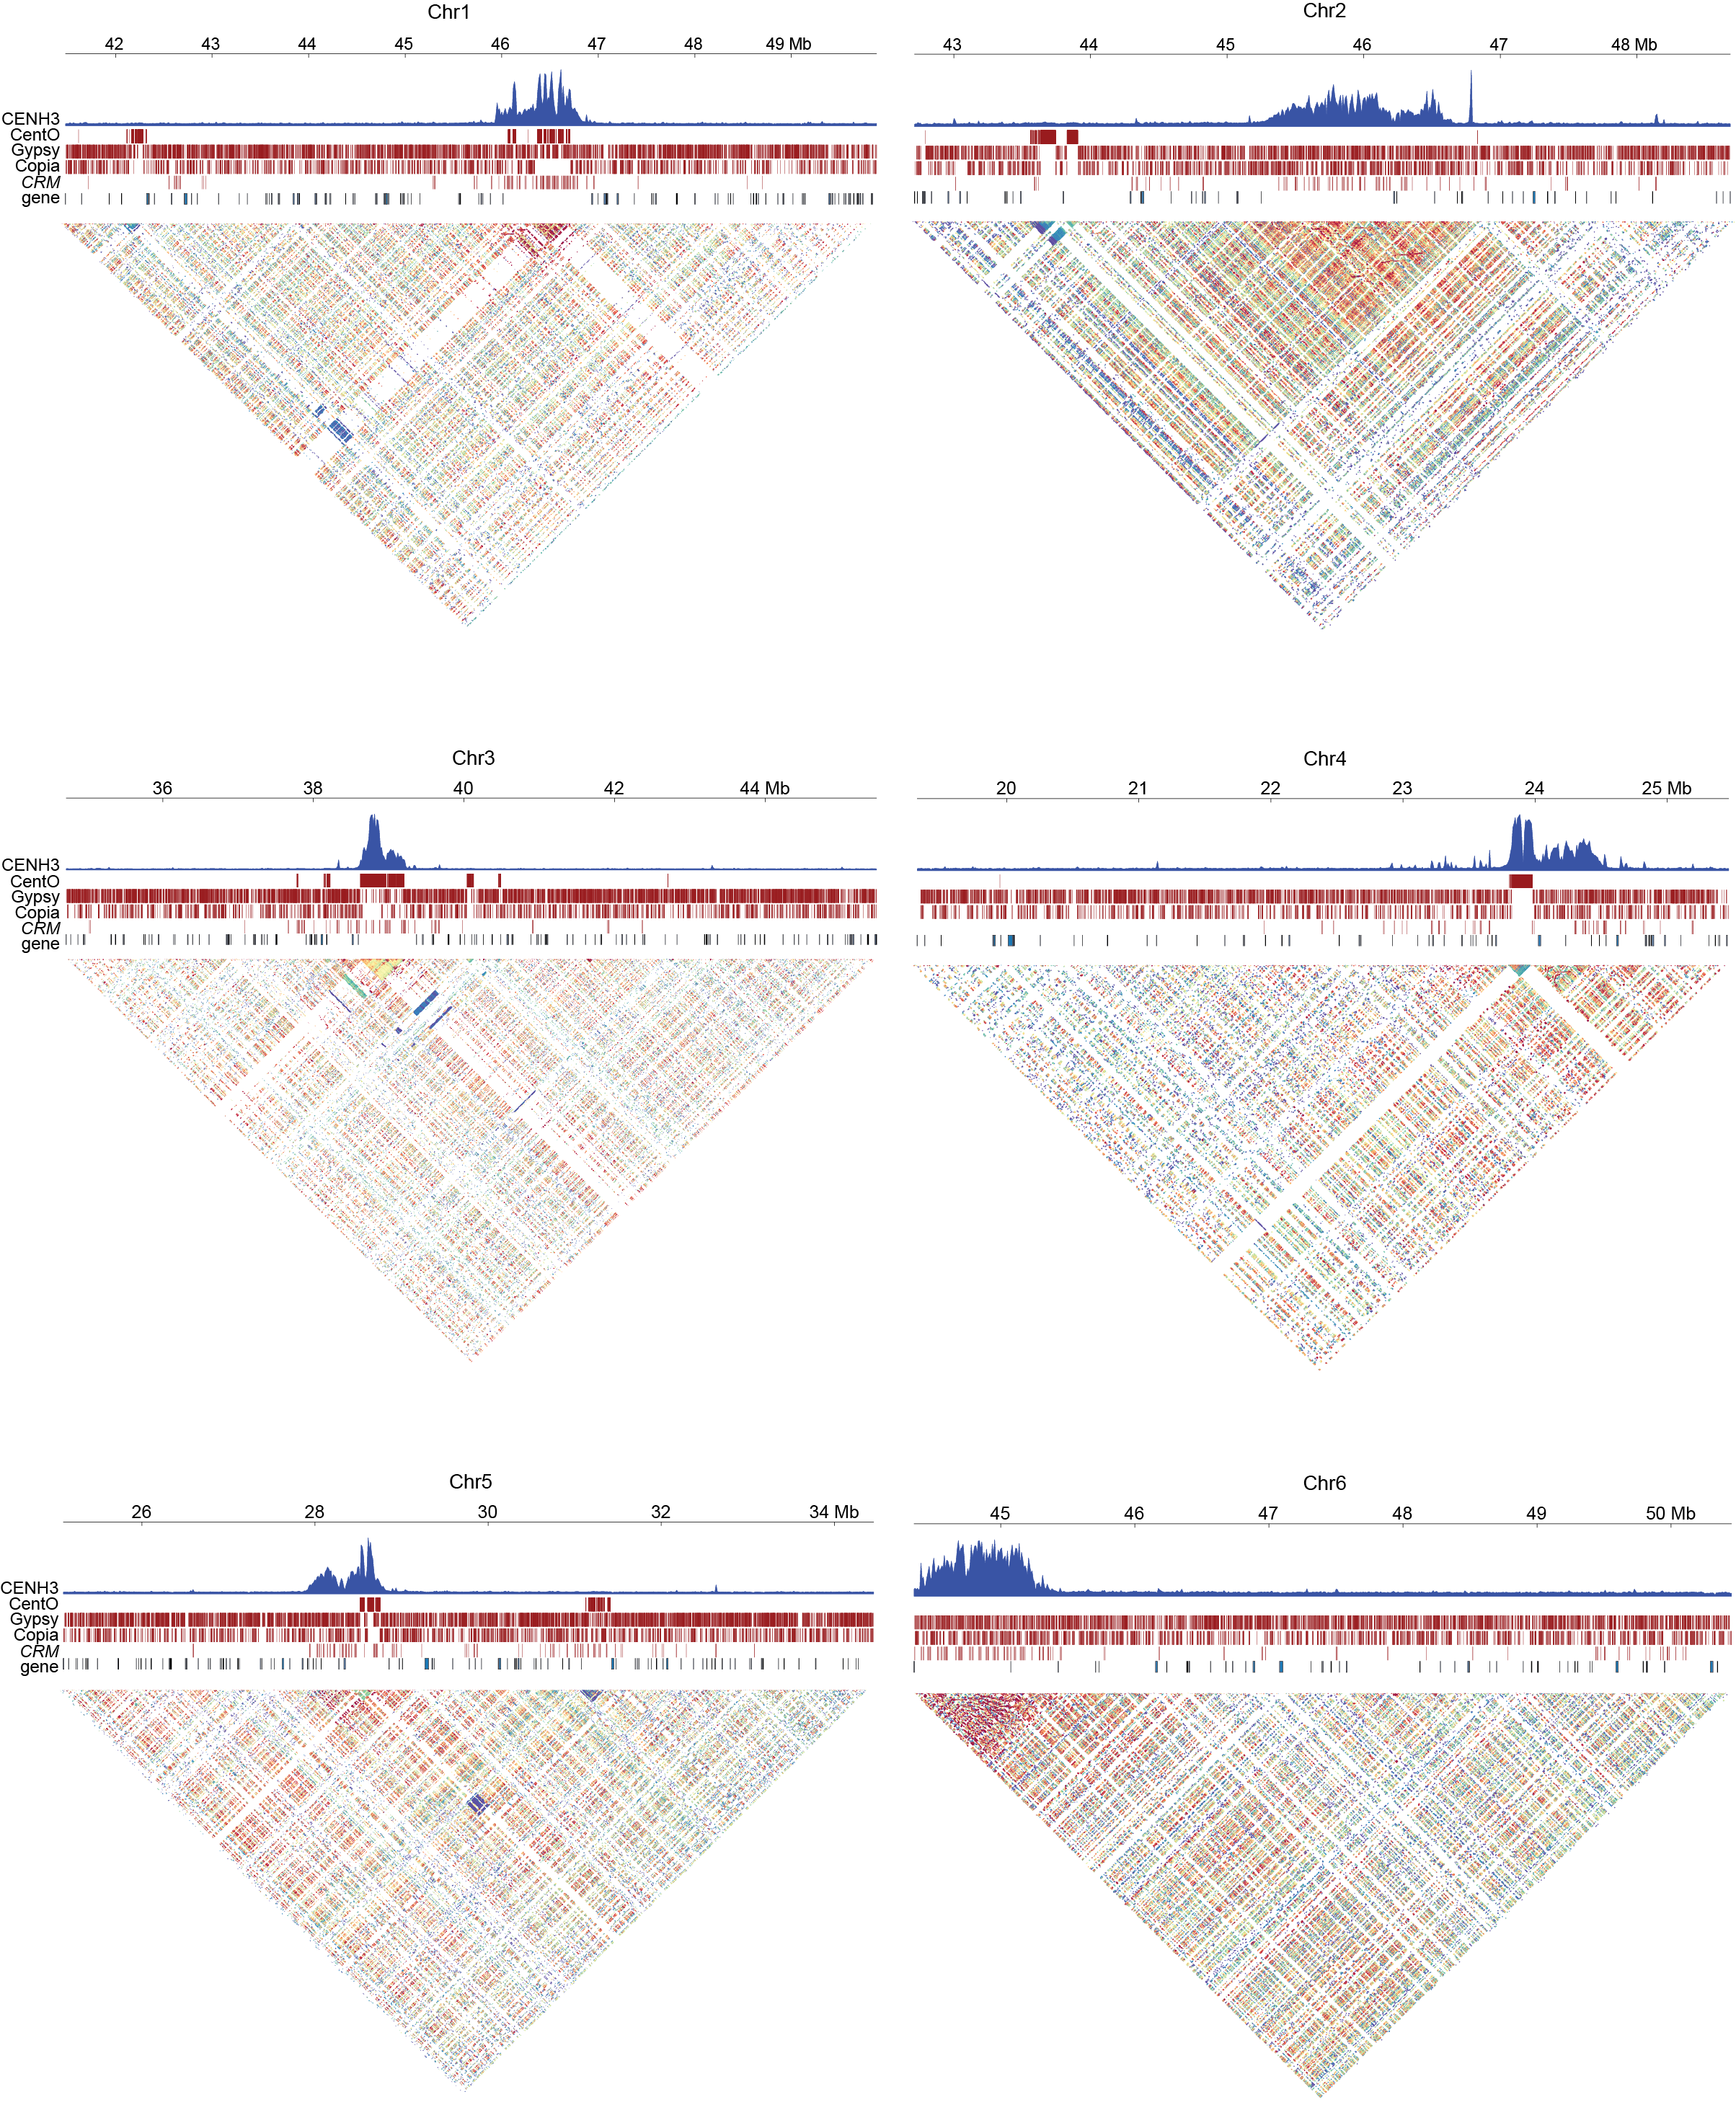


Supplementary Figure 9. Characteristics of centromeres across *O. australiensis* Chr1-Chr6, including the information on CENH3, satellites, *Gypsy*, *Copia*, *CRM* and gene.


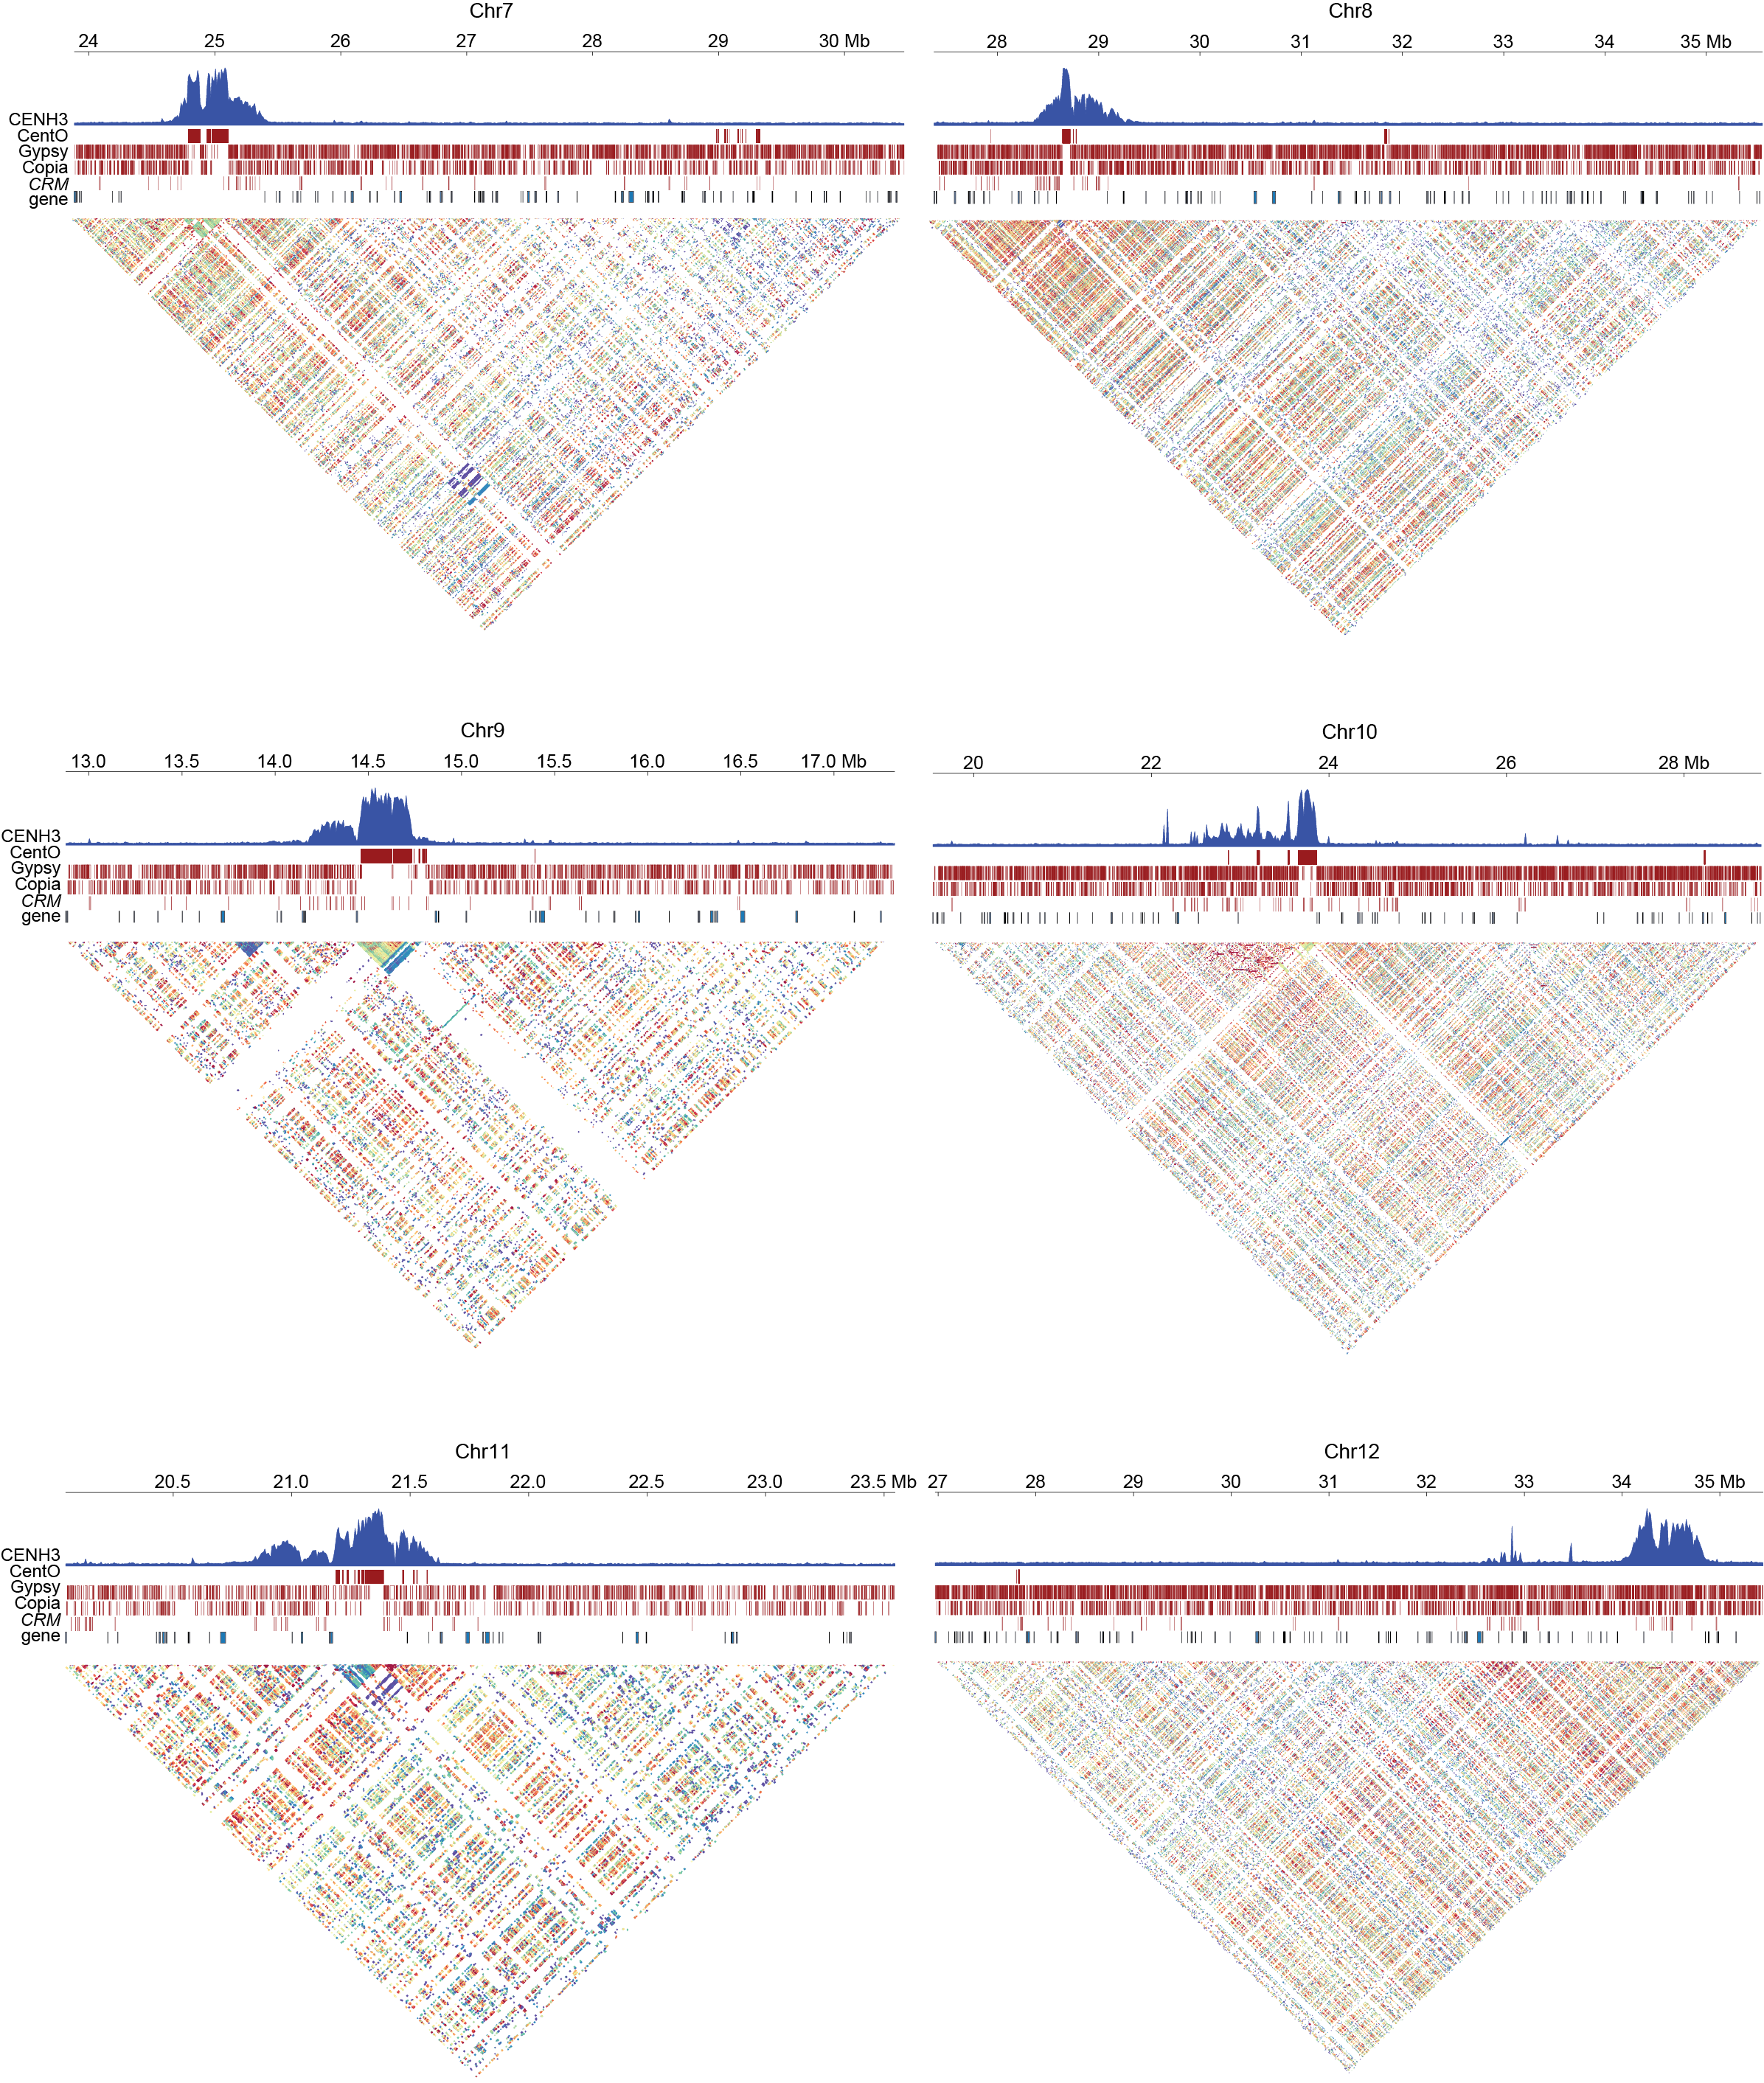


Supplementary Figure 10. Characteristics of centromeres across *O. australiensis* Chr7-Chr12, including the information on CENH3, satellites, *Gypsy*, *Copia*, *CRM*, and gene.


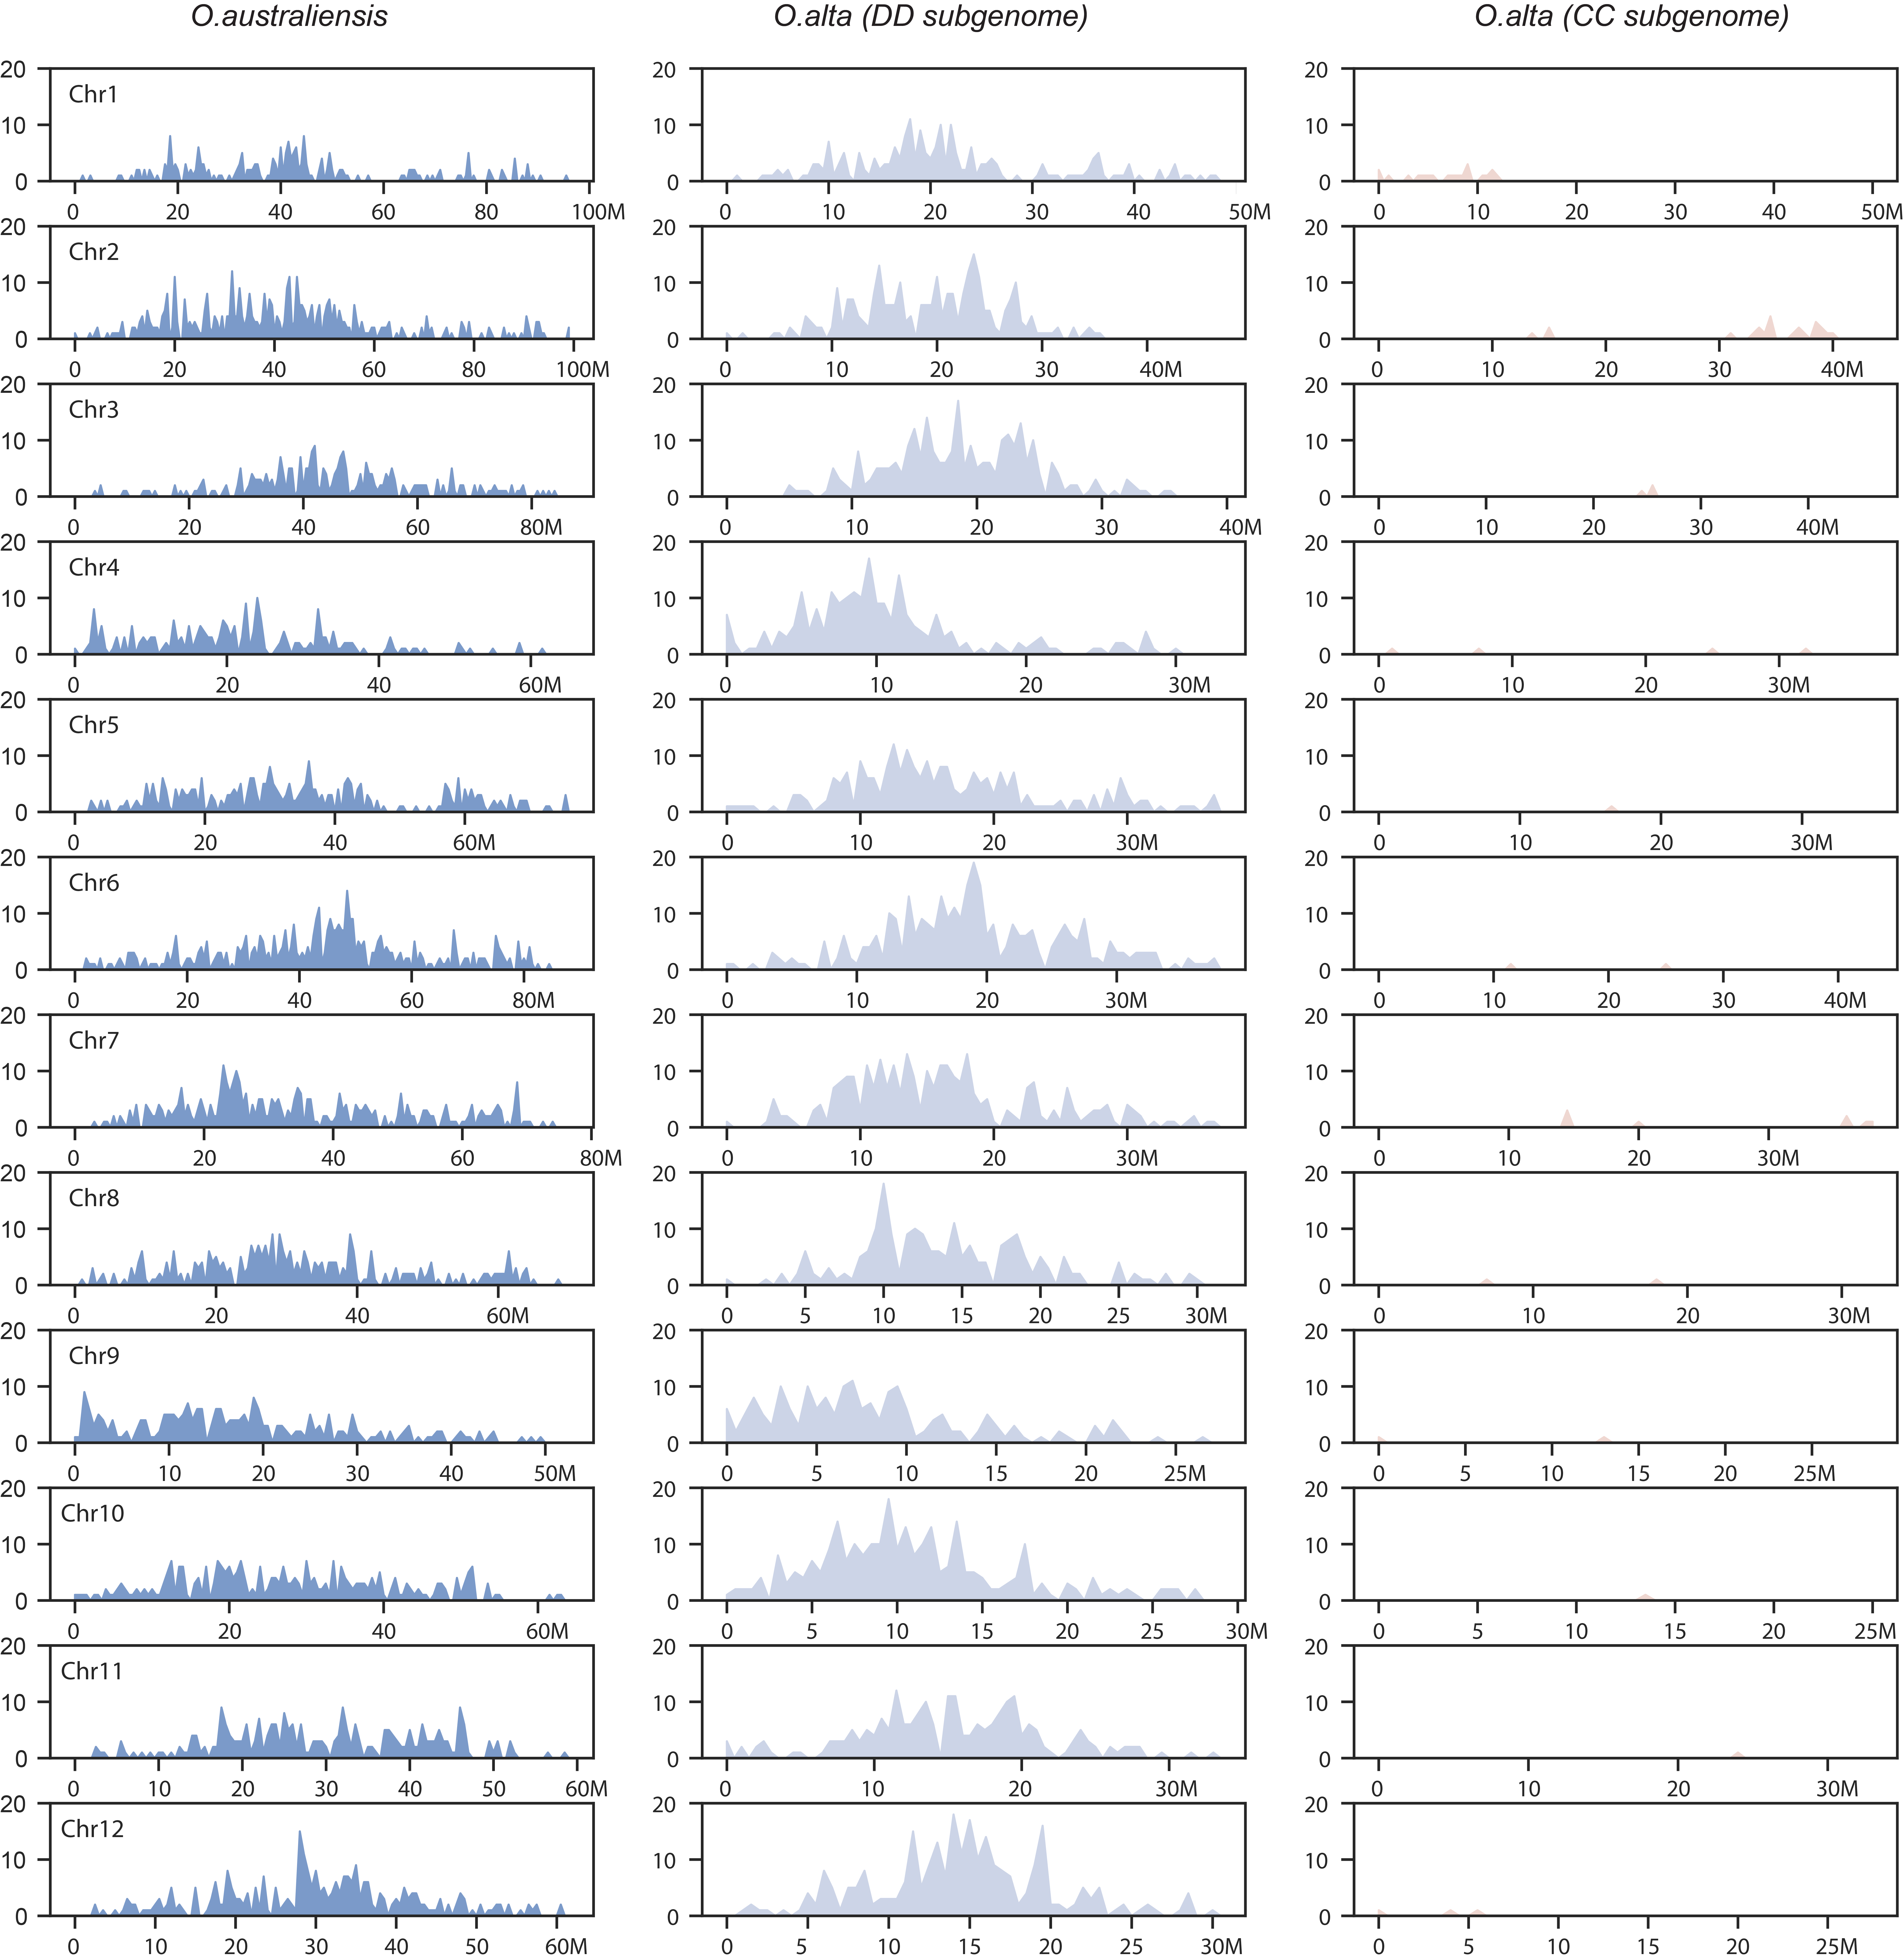


Supplementary Figure 11. Distribution of repeat sequence markers on the genomes of *O. australiensis* and *O. alta*.

| Platform | Total reads | Map Reads | Map Rate | Covered genome | Covered depth |
| --- | --- | --- | --- | --- | --- |
| Ultra-long ONT | 368,744 | 368,740 | 100% | 99.98% | 22.65 |
| PromethION | 4,241,979 | 4,233,154 | 99.79% | 99.97% | 88.71 |
| WGS | 690,826,394 | 681,262,720 | 98.62% | 99.12% | 113.15 |
| CENH3 ChIP-seq | 68,427,736 | 67,719,140 | 98.96% | / | / |
| Input | 56,262,947 | 56,075,605 | 99.67% | / | / |

Supplementary Table 1 The mapping rate of sequencing reads to assembled genome.

| Genome feature | Statistic |
| --- | --- |
| Number of genes | 36753 |
| Annotation genes | 33426 |
| Number of non-TE gene loci | 33565 |
| Gene length (Mb) | 110.3 |
| Average lengths of genes | 2999 bp |
| Average lengths of proteins | 362 aa |
| BUSCO genes (%) (transcript) | 97.2% |

Supplementary Table 2 Statistics of *O. australiensis* genome annotation

| Class | Superfamily | Abbr. | number | Total length (Mb) |  |  |  | |
| --- | --- | --- | --- | --- | --- | --- | --- | --- |
| repeat percentage (%) | | |
| Class I | Gypsy | RLG | 396,423 | 338.0 | 47.13 | | |
|  | Copia | RLC | 114,241 | 100.4 | 13.99 | | |
|  | Unclassified LTR | RLX | 311,487 | 217.7 | 30.35 | | |
|  | LINE | RIX | 1,984 | 1.2 | 0.16 | | |
|  | SINE | RSX | 1,847 | 0.26 | 0.036 | | |
|  | Retroelement | RXX | 2,129 | 0.8 | 0.11 | | |
| Class II | En-Spm | DTC | 71,971 | 41.1 | 5.73 | | |
|  | Harbinger | DTH | 1,960 | 0.57 | 0.079 | | |
|  | hAT | DTA | 9,298 | 3.7 | 0.51 | | |
|  | Mite | DXX | 15,069 | 2.2 | 0.30 | | |
|  | MuDR | DTM | 3,734 | 3.6 | 0.50 | | |
|  | Stowaway | DXX | 338 | 0.03 | 0.0041 | | |
|  | TcMar | DTT | 281 | 0.05 | 0.0069 | | |
|  | Tourist | DXX | 5,380 | 0.8 | 0.11 | | |
|  | Helitron | DHH | 296 | 0.05 | 0.0069 | | |
|  | Unclassified | DTX | 16,217 | 3.6 | 0.50 | | |
| microsatellite |  | XXX | 156,698 | 7.7 | 1.07 | | |
| satellite |  | XXX | 14,349 | 2.1 | 0.30 | | |
| Others |  | XXX | 10,119 | 3.1 | 0.43 | | |

Supplementary Table 3 Repetitive elements in *O. australiensis* genome assembly

|  | Short arm Start (bp) | Short arm End (bp) | Length (bp) | Long arm Start (bp) | Long arm End (bp) | Length (bp) | TTTAGGG length  (short arm, long arm) | CCCAGG length  (short arm, long arm) | TTTAAAA length  (short arm, long arm) |
| --- | --- | --- | --- | --- | --- | --- | --- | --- | --- |
| Chr1 | 1 | 27,500 | 27,500 | 96,731,056 | 96,759,856 | 28,800 | (10171, 18550) | (24, 24) | (497, 56) |
| Chr2 | 1 | 15,500 | 15,500 | 99,765,624 | 99,808,224 | 42,600 | (14441, 2037) | (30, 17436) | (119, 0) |
| Chr3 | 1 | 26,100 | 26,100 | 86,574,749 | 86,592,649 | 17,900 | (23240, 15029) | (72, 18) | (84, 217) |
| Chr4 | 1 | 22,500 | 22,500 | 65,125,621 | 65,148,821 | 23,200 | (14994, 19698) | (72, 30) | (49, 182) |
| Chr5 | 1 | 17,400 | 17,400 | 76,755,610 | 76,771,310 | 15,700 | (14931, 2142) | (132, 4890) | (98, 63) |
| Chr6 | 1 | 31,200 | 31,200 | 88,825,723 | 88,843,223 | 17,500 | (18865, 15701) | (72, 18) | (77, 182) |
| Chr7 | 1 | 35,700 | 35,700 | 76,910,918 | 76,927,318 | 16,400 | (2618, 14679) | (9492, 48) | (105, 140) |
| Chr8 | 1 | 33,900 | 33,900 | 70,309,736 | 70,330,636 | 20,900 | (26901, 18431) | (114, 90) | (56, 119) |
| Chr9 | 1 | 9,400 | 9,400 | 53,203,168 | 53,236,468 | 33,300 | (2793, 28378) | (84, 24) | (1694, 126) |
| Chr10 | 1 | 14,100 | 14,100 | 65,866,565 | 65,900,465 | 33,900 | (13734, 31094) | (54, 6) | (147, 84) |
| Chr11 | 1 | 38,900 | 38,900 | 59,513,268 | 59,546,068 | 32,800 | (34916, 22967) | (36, 24) | (0, 6762) |
| Chr12 | 1 | 29,000 | 29,000 | 62,006,032 | 62,023,932 | 17,900 | (19544, 17675) | (96, 42) | (35, 217) |

Supplementary Table 4 Identified regions of telomeres in *O. australiensis*

| Chromosome | Start | End | Length |
| --- | --- | --- | --- |
| Chr1 | 45,938,503 | 46,959,938 | 1,021,435 |
| Chr2 | 45,163,190 | 46,804,302 | 1,641,112 |
| Chr3 | 38,327,929 | 39,347,410 | 1,019,481 |
| Chr4 | 22,830,993 | 24,828,407 | 1,997,414 |
| Chr5 | 27,933,890 | 29,050,425 | 1,116,535 |
| Chr6 | 44,103,055 | 45,489,299 | 1,386,244 |
| Chr7 | 24,584,820 | 25,373,809 | 788,989 |
| Chr8 | 28,190,554 | 29,204,479 | 1,013,925 |
| Chr9 | 14,048,014 | 14,958,778 | 910,764 |
| Chr10 | 22,379,799 | 24,119,357 | 1,739,558 |
| Chr11 | 20,846,911 | 21,771,748 | 924,837 |
| Chr12 | 34,069,784 | 34,966,430 | 896,646 |

Supplementary Table 5 Identified regions of centromeres in *O. australiensis*

|  | Satellite repetitive sequences |
| --- | --- |
| EE | AACATCGCATCCACGTGAGCCAATATCGGCACTAAGTGTCAAAAGTTCGCCGCGCGAGTCACGGAGAGATTTGTCGAAACGAACGCACCCAATCCACTCCAATATGTCCAAAACTCATGTTTTGGTGCTTTTTGAACAATTTCGTTCCGGTGAAA |
| FF | GACTATGCACACCGAGATAACTACACATATTGTGCGTCCACTTGGTTTACACTTCGTGGTCGAACACAACTTCGGTAGCAAAACTCCCGAGCATGAAGAGTACACTTGGATTCCACCATCAACTTCACCTTTCATGCAATGGCAACAAAGATTC |
| CCDD | AACATCGCACCCACCTGAGCAAATATCGGCTTTAAATGTGAAAAGTTCGCCGCGCGAGTCACGGAGAGATTTTTCGAAACGAACGCACCCAATCCACTCCAATATGTCCAAAACTCATGTTTTGGTGCTTTTTGAACGATTTCGTTCCGGTGAAA |
| CCDD | GGTGGGCCTGCCGTAATTTTCTGTGGTGCGAAAACGAAACCGCTCGAAACCACTCAAAAGTGTTTTTGGGCATCTAGGAATGTGTTTCGCACCATTTGTTGCGAAAAATAGTTTTTACACGAGTC |
| CC | GGTGGGCCCGCCGGAAAGTTTGTGTGGTGCGAAAACGAAACCGCTCGAAACCACTCAAAAGTGTTTTTGGGCATCTAGGAATGTGTTTGGCACCATTGGTTGCGAAAATTAATTTTTACACGAGTC |
| CC | AGTCGAAACGACATCCGTTATGATGGAAATGCATGACAACATGGAATTTGAAGAGAGTTTTTTAGCCCGTCCAATGTCGTTCTTTCCCTGCCACGCTACCACAAATTAGTTCCTAAACCTGACGTGCTCGGTGTAGAAGGGCCCTCAACGGACCAGATTAACTTGTTGTGGGGTTATTTCCATCGAAACTTTAAGGACATTGCCCTAAAACGCATCGCTTATCCAAAGGTTGTGCCAAACAAGGTGAGGAATGTGTTTATTCACCAAGTTTCTAAACTTTTCCCCTGAAAAGGTTGCATGCTCCATGACGTAGCACGCATGAGTGCCACTCCAGGGCCTTGTAGAATGTCTCCGTTGCCAGATATC |
| BB | AACATCGCACCCACGTGTGCCAATATTGGCATTAATTGACAAAAGTTCGCCGCGCCAGTCACGAAGTGATTTTTCGACACGTACGCACCCAATCCACTCCAATATGTCCAAAACTCATGTTTTGGTGCTTTTTGAACTTTTTCGTTCCGGCTAAA |

Supplementary Table 6 Satellite repetitive sequences in the centromeric region of the *Oryza* genus

|  | EE | AA (NIP) | AA (MH63) |
| --- | --- | --- | --- |
| Chr1 | 241,639 | 429,115 | 475,620 |
| Chr2 | 156,120 | 405,318 | 457,714 |
| Chr3 | 437,876 | 215,446 | 146,711 |
| Chr4 | 139,630 | 42,969 | 55,356 |
| Chr5 | 167,034 | 85,443 | 87,529 |
| Chr6 | 133 | 678,325 | 74,754 |
| Chr7 | 243,250 | 150,254 | 458,364 |
| Chr8 | 86,778 | 48,273 | 49,913 |
| Chr9 | 261,722 | 374,089 | 84,963 |
| Chr10 | 225,206 | 213,438 | 45,768 |
| Chr11 | 78,884 | 1,208,069 | 285,500 |
| Chr12 | 4,545 | 400,245 | 151,980 |
| Total | 2,038,272 | 4,250,984 | 2,374,172 |

Supplementary Table 7 The total length of satellite repetitive sequences in *O. australiensis* and *O. sativa.*

|  | Gene id | homologous gene | Leaf TPM | Root TPM | Panicle TPM | CENH3 binding |
| --- | --- | --- | --- | --- | --- | --- |
| Chr1 | OAUS01g019130 |  | 0 | 0 | 0 | Yes |
| Chr1 | OAUS01g019140 |  | 0.91 | 1.72 | 0.57 |  |
| Chr1 | OAUS01g019150 | AGIS_Os01g026560 | 13.83 | 39.35 | 9.48 |  |
| Chr10 | OAUS10g005550 | AGIS_Os10g011030 | 16.74 | 49.75 | 15.19 |  |
| Chr10 | OAUS10g005560 |  | 0 | 0 | 0 | yes |
| Chr10 | OAUS10g005570 |  | 0 | 0 | 0 |  |
| Chr10 | OAUS10g005580 | AGIS_Os10g011070 | 0 | 3.31 | 0.040 |  |
| Chr11 | OAUS11g010520 | AGIS_Os02g029090 | 0 | 0 | 0 | yes |
| Chr11 | OAUS11g010530 | AGIS_Os11g017440 | 0.060 | 4.06 | 0.27 |  |
| Chr11 | OAUS11g010540 | AGIS_Os12g011950 | 124.37 | 180.05 | 73.60 |  |
| Chr11 | OAUS11g010550 |  | 79.32 | 53.48 | 51.84 |  |
| Chr11 | OAUS11g010560 |  | 0 | 0 | 0 | yes |
| Chr11 | OAUS11g010570 |  | 0 | 0 | 0 | yes |
| Chr11 | OAUS11g010580 | AGIS_Os02g003750 | 81.29 | 53.45 | 46.15 |  |
| Chr11 | OAUS11g010590 | AGIS_Os11g017720 | 14.71 | 20.77 | 17.58 |  |
| Chr11 | OAUS11g010600 | AGIS_Os11g017610 | 21.07 | 29.71 | 31.05 |  |
| Chr12 | OAUS12g010820 |  | 0 | 0 | 0 | yes |
| Chr12 | OAUS12g010830 |  | 0 | 0 | 0 | yes |
| Chr12 | OAUS12g010840 | AGIS_Os06g010990 | 0 | 0 | 0 |  |
| Chr12 | OAUS12g010850 | AGIS_Os12g020170 | 1.20 | 0.18 | 0 |  |
| Chr12 | OAUS12g010860 | AGIS_Os12g020180 | 1171.74 | 0.17 | 1136.82 |  |
| Chr2 | OAUS02g015490 |  | 0 | 0 | 0 |  |
| Chr2 | OAUS02g015500 | AGIS_Os02g020950 | 20.58 | 32.90 | 11.57 |  |
| Chr2 | OAUS02g015510 |  | 0 | 0 | 0 | yes |
| Chr2 | OAUS02g015520 |  | 0 | 0 | 0 | yes |
| Chr2 | OAUS02g015530 | AGIS_Os02g020990 | 0 | 0.51 | 0.29 |  |
| Chr2 | OAUS02g015540 | AGIS_Os02g020880 | 80.27 | 376.13 | 43.24 |  |
| Chr2 | OAUS02g015550 |  | 0 | 0 | 0 |  |
| Chr2 | OAUS02g015560 |  | 0 | 0.35 | 0 |  |
| Chr3 | OAUS03g024480 | AGIS_Os03g029050 | 33.57 | 22.15 | 26.78 |  |
| Chr3 | OAUS03g024490 |  | 0 | 0 | 0 |  |
| Chr4 | OAUS04g004920 |  | 0 | 0 | 0 |  |
| Chr4 | OAUS04g004930 |  | 0 | 0 | 0 |  |
| Chr4 | OAUS04g004940 |  | 0 | 0 | 0 |  |
| Chr4 | OAUS04g004950 |  | 0 | 0 | 0 |  |
| Chr4 | OAUS04g004960 |  | 0 | 0 | 0 | yes |
| Chr4 | OAUS04g004970 | AGIS_Os12g008360 | 0.87 | 1.73 | 0 |  |
| Chr4 | OAUS04g004980 |  | 0 | 0 | 0 |  |
| Chr4 | OAUS04g004990 |  | 0 | 0 | 0 |  |
| Chr4 | OAUS04g005000 | AGIS_Os04g017270 | 0 | 7.16 | 0 |  |
| Chr4 | OAUS04g005010 |  | 0 | 0 | 0 |  |
| Chr4 | OAUS04g005020 |  | 0 | 0 | 0 |  |
| Chr4 | OAUS04g005030 |  | 0 | 0 | 0 |  |
| Chr4 | OAUS04g005040 | AGIS_Os04g017070 | 0 | 0 | 0 |  |
| Chr4 | OAUS04g005050 | AGIS_Os06g003090 | 19.12 | 19.82 | 11.93 |  |
| Chr4 | OAUS04g005060 | AGIS_Os04g017000 | 10.29 | 29.56 | 5.46 |  |
| Chr4 | OAUS04g005080 |  | 0 | 0 | 0 | yes |
| Chr4 | OAUS04g005110 |  | 0 | 0 | 0 | yes |
| Chr4 | OAUS04g005120 |  | 0 | 0 | 0 | yes |
| Chr4 | OAUS04g005130 | AGIS_Os04g017690 | 0 | 0 | 0 |  |
| Chr4 | OAUS04g005140 | AGIS_Os04g017540 | 9.29 | 18.325 | 20.25 |  |
| Chr5 | OAUS05g010920 |  | 0 | 0 | 0 | yes |
| Chr5 | OAUS05g010930 |  | 0 | 0 | 0 | yes |
| Chr5 | OAUS05g010940 |  | 0 | 0 | 0 | yes |
| Chr5 | OAUS05g010950 | AGIS_Os05g019350 | 13.17 | 7.15 | 19.30 |  |
| Chr5 | OAUS05g010960 | AGIS_Os05g019340 | 14.84 | 15.80 | 23.43 |  |
| Chr5 | OAUS05g010970 | AGIS_Os05g019340 | 0.15 | 1.21 | 0.13 |  |
| Chr5 | OAUS05g010980 | AGIS_Os05g019340 | 0.98 | 2.85 | 0 |  |
| Chr5 | OAUS05g010990 | AGIS_Os05g019290 | 11.39 | 1.47 | 10.50 |  |
| Chr5 | OAUS05g011000 |  | 0 | 0 | 0 |  |
| Chr5 | OAUS05g011010 |  | 0 | 0 | 0 |  |
| Chr6 | OAUS06g016440 |  | 0 | 0 | 0 |  |
| Chr6 | OAUS06g016450 | AGIS_Os06g021720 | 11.94 | 1.06 | 41.24 |  |
| Chr6 | OAUS06g016460 |  | 0 | 0 | 0 | yes |
| Chr6 | OAUS06g016480 | AGIS_Os06g021820 | 0 | 11.40 | 0.057 |  |
| Chr8 | OAUS08g010320 | AGIS_Os08g018640 | 36.39 | 81.00 | 20.50 |  |
| Chr8 | OAUS08g010330 |  | 0 | 0 | 0 |  |
| Chr8 | OAUS08g010340 | AGIS_Os08g018630 | 67.59 | 40.9 | 78.10 |  |
| Chr8 | OAUS08g010350 |  | 0 | 0 | 8.13 |  |
| Chr8 | OAUS08g010360 |  | 0 | 0 | 0 | yes |
| Chr8 | OAUS08g010370 | AGIS_Os12g023190 | 0 | 0 | 0 | yes |
| Chr8 | OAUS08g010380 | AGIS_Os08g018540 | 22.31 | 14.05 | 41.34 |  |
| Chr9 | OAUS09g001910 | AGIS_Os01g000810 | 41.50 | 32.51 | 65.75 |  |
| Chr9 | OAUS09g001920 |  | 36.96 | 25.27 | 30.86 |  |
| Chr9 | OAUS09g001930 | AGIS_Os01g007370 | 14.08 | 21.18 | 17.70 |  |
| Chr9 | OAUS09g001940 | AGIS_Os08g023370 | 15.98 | 26.50 | 15.81 |  |
| Chr9 | OAUS09g001950 | AGIS_Os08g023370 | 12.37 | 18.88 | 14.50 |  |
| Chr9 | OAUS09g001960 |  | 8.22 | 17.61 | 7.98 |  |
| Chr9 | OAUS09g001970 | AGIS_Os09g011370 | 26.59 | 21.54 | 16.88 |  |
| Chr9 | OAUS09g001990 | AGIS_Os09g014320 | 19.94 | 62.02 | 7.08 |  |
| Chr9 | OAUS09g002000 |  | 0 | 0 | 0 |  |

Supplementary Table 8 Information about genes in functional centromere regions

|  | other DNA | DNA/En-Spm | LINE | LTR | LTR/Copia | LTR/Gypsy | RC/Helitron | Retroelement | SINE |
| --- | --- | --- | --- | --- | --- | --- | --- | --- | --- |
| O. rufipogon | 6.21482738 | 5.4313746 | 0.26818129 | 52.7658028 | 6.71735982 | 27.9949236 | 0.1755121 | 0.15279434 | 0.27922412 |
| O. nivara | 11.0065866 | 4.13071028 | 0.49802682 | 55.9960438 | 8.39993185 | 19.0990915 | 0.1115764 | 0.22465209 | 0.53338079 |
| O. meridionalis | 6.67273127 | 7.81020095 | 0.32686286 | 54.178829 | 8.2728488 | 22.2024213 | 0.06603258 | 0.15509258 | 0.31498069 |
| O. punctata | 5.70681207 | 10.5145728 | 0.47593851 | 38.412829 | 9.02884551 | 35.3869825 | 0.0588278 | 0.19563633 | 0.21955555 |
| O. brachyantha | 18.748716 | 3.01634821 | 0.08063069 | 51.7891097 | 10.7768174 | 14.6676298 | 0.05920277 | 0.15779948 | 0.70374591 |
| O. eichingeri | 5.19618756 | 9.43216025 | 0.10884865 | 39.3203454 | 9.30223484 | 36.0670003 | 0.08758111 | 0.18451346 | 0.30112837 |
| O. granulata | 4.76337678 | 0.8891655 | 0.20821331 | 44.5909101 | 7.67969986 | 41.0887907 | 0.05755343 | 0.68183177 | 0.04045853 |
| O. sativa (NIP) | 7.38867763 | 5.79873609 | 0.34334465 | 54.6950082 | 8.00685717 | 23.0629743 | 0.11987221 | 0.25274192 | 0.33178784 |
| O. rhizomatis | 4.55400025 | 9.21331469 | 0.0762061 | 36.4619389 | 8.76280287 | 40.4923483 | 0.04753283 | 0.16811221 | 0.22374391 |
| O. sativa (MH63) | 6.76041125 | 4.85792346 | 0.30490106 | 54.8360297 | 6.94680864 | 25.6784833 | 0.11118285 | 0.20079313 | 0.30346653 |
| O. glumipatula | 11.0474746 | 3.71014613 | 0.55141266 | 56.1219751 | 8.20051781 | 19.4860741 | 0.09769709 | 0.24402149 | 0.54068097 |
| O. barthii | 8.76726192 | 5.37521363 | 0.43210572 | 54.3882984 | 9.34976545 | 20.9672136 | 0.09426545 | 0.21145896 | 0.41441684 |
| O. glaberrima | 9.1016339 | 5.48818016 | 0.43690876 | 54.3425109 | 9.11320786 | 20.7841943 | 0.09684859 | 0.20742571 | 0.42908981 |
| O. longistaminata | 12.610028 | 3.78062359 | 0.59453128 | 58.1572625 | 8.11461902 | 15.854799 | 0.10224474 | 0.12945452 | 0.65643733 |
| O. alta (CC) | 4.80812507 | 12.6436245 | 0.10046657 | 35.9016779 | 10.3472037 | 35.681671 | 0.03491565 | 0.23568539 | 0.24663024 |
| O. alta (DD) | 3.57169812 | 8.95471028 | 0.12271083 | 32.3535158 | 13.9274974 | 40.7488348 | 0.01640029 | 0.1632557 | 0.14137671 |
| O. australiensis | 1.98557464 | 6.33486937 | 0.18503048 | 28.6087934 | 15.2131523 | 47.5466409 | 0.00741482 | 0.08574884 | 0.03277532 |
| O. officinalis | 4.41786263 | 9.15462197 | 0.06724743 | 36.0831698 | 6.85890185 | 43.0611076 | 0.03779713 | 0.11175103 | 0.20754053 |
| O. minuta(BB) | 5.97878168 | 10.8785192 | 0.38851426 | 40.6440174 | 9.71523861 | 32.032292 | 0.0410981 | 0.15256502 | 0.16897374 |
| O. minuta(CC) | 4.86761965 | 9.58759795 | 0.07881134 | 35.7184548 | 10.3040614 | 39.0718549 | 0.04274257 | 0.11660438 | 0.21225295 |

Supplementary Table 9 Proportions of TEs in the genomes of *Oryza*

|  | Copia | | | | | | | Gypsy | | | | | |
| --- | --- | --- | --- | --- | --- | --- | --- | --- | --- | --- | --- | --- | --- |
|  | Bianca | Angela | Tork | Ale | Ikeros | SIRE | Ivana | Athila | Reina | Ogre | Retand | Tekay | CRM |
| O. australiensis | 27 | 1390 | 13 | 65 | 92 | 100 | 50 | 3 | 59 | 468 | 1478 | 989 | 125 |
| O. alta DD | 21 | 85 | 47 | 51 | 66 | 4 | 45 | 0 | 31 | 657 | 22 | 109 | 34 |
| O. alta CC | 27 | 46 | 55 | 56 | 64 | 17 | 54 | 0 | 20 | 585 | 47 | 87 | 21 |
| O. granulate | 14 | 39 | 0 | 95 | 68 | 42 | 85 | 0 | 101 | 305 | 743 | 135 | 130 |
| O. officinalis | 35 | 39 | 114 | 84 | 139 | 194 | 211 | 3 | 29 | 2090 | 1037 | 744 | 300 |
| O. punctata | 15 | 22 | 17 | 36 | 32 | 40 | 20 | 0 | 14 | 197 | 240 | 93 | 47 |
| O. rhizomatis | 6 | 5 | 22 | 18 | 32 | 39 | 43 | 0 | 3 | 73 | 117 | 10 | 17 |
| O. sativa | 14 | 3 | 17 | 118 | 52 | 53 | 82 | 3 | 111 | 52 | 574 | 354 | 37 |
| O. eichingeri | 4 | 3 | 12 | 31 | 10 | 13 | 24 | 2 | 1 | 5 | 149 | 6 | 16 |
| O. meridionalis | 8 | 2 | 15 | 27 | 17 | 18 | 34 | 5 | 24 | 38 | 86 | 298 | 14 |
| O. glaberrima | 4 | 0 | 13 | 29 | 6 | 25 | 26 | 1 | 27 | 38 | 65 | 35 | 7 |
| O. longistaminata | 0 | 0 | 2 | 7 | 4 | 1 | 2 | 0 | 14 | 2 | 5 | 1 | 0 |
| O. rufipogon | 8 | 0 | 13 | 45 | 37 | 21 | 34 | 1 | 64 | 30 | 612 | 500 | 24 |
| O. nivara | 1 | 0 | 2 | 19 | 0 | 0 | 2 | 0 | 21 | 1 | 2 | 0 | 0 |
| O. barthii | 0 | 0 | 0 | 25 | 0 | 2 | 6 | 0 | 28 | 4 | 11 | 0 | 0 |
| O. brachyantha | 0 | 0 | 2 | 7 | 0 | 1 | 2 | 0 | 7 | 0 | 1 | 0 | 0 |
| O. glumipatula | 0 | 0 | 0 | 7 | 1 | 0 | 1 | 1 | 11 | 0 | 15 | 0 | 0 |

Supplementary Table 10 Abundance of *Copia* and *Gypsy* LTR subfamilies in the *Oryza* genus

|  | sequence |
| --- | --- |
| Angela-Rep-DDEE | ATATGTGTCCATATTATCGATGTGCTATCTCCATACCATGTTCTAATGAGACATGATCATCAATCAATACATGTGCTGATCGAGTGGTCATATTGTTCATATATGATATATGATCAGGGATCATTTAGACATAATAGCATAACATAGATAGTCTCATGAATGAGTCACGTACTCATTGAACAATAAAGTTACTTATATCAAGGAACACTTTAAAATATATAAACATAGTTTGTGATACAACCTCTCCATACTGTCTCTAGGGCATATCACTTACA |

Supplementary Table 11 The sequence of *Angela*-Rep-DDEE

| Ingroup1 | Ingroup2 | Outgroup | Genes | Identical | Divergent | Ingroup1 specific | Ingroup2 specific | Outgroup specific | Fast-evolving | CHI^2 test statistics | P-value |
| --- | --- | --- | --- | --- | --- | --- | --- | --- | --- | --- | --- |
| O.alta CC | O.alta DD | B. distachyon | 1,460 | 572,828 | 10,714 | 13,205 | 12,994 | 114,973 | equality | 1.7 | 0.19 |
| O.alta CC | EE | B. distachyon | 1,460 | 596,932 | 10,377 | 13,845 | 10,547 | 119,060 | O.alta CC | 445.92 | 0 |
| O.alta DD | EE | B. distachyon | 1,460 | 600,837 | 6,050 | 9,691 | 6,555 | 128,950 | O.alta DD | 605.35 | 0 |
| O.alta CC | O. eichingeri | B. distachyon | 1,460 | 586,027 | 4,305 | 7,789 | 5,473 | 129,088 | O.alta CC | 404.45 | 0 |
| O.alta CC | O. rhizomatis | B. distachyon | 1,460 | 583,766 | 4,985 | 7,742 | 7,434 | 128,538 | O.alta CC | 6.25 | 0.012 |

Supplementary Table 12 Statistics of evolutionary rate in CC, EE and CCDD genomes.

|  | 5’-3’ |
| --- | --- |
| Primer1 | TCATGCACATCCCACTCCATGT |
| Primer2 | ACCCACCACGAGACACTACA |

Supplementary Table 13 *Angela*-Rep-DDEE sequence primers
